# Supplementary material for: Micronuclei-based model system reveals functional consequences of chromothripsis in human cells
Source: eLife. 2019 Nov 28;8:e50292. doi: 10.7554/eLife.50292 (PMC6910827; doi:10.7554/eLife.50292)
Supplement: Figure 2—source data 1. [file elife-50292-fig2-data1.xlsx]

## Sheet: Figure 2
Figure 2i						Figure 2k
	pos. ctrl	untr	colch	MN			pos. ctrl	colch	colch+DCB	MN
Mean	54	3.133	3.7	49.35		Mean	91.33	1.725	3	8.667
Std. Deviation	0	2.013	1.473	3.323		Std. Deviation	6.014	1.014	1.587	2.458
Std. Error	0	1.162	0.8505	2.35		Std. Error	3.472	0.5072	0.9165	1.419
Lower 95% CI of mean	0	-1.868	0.04065	19.49		Lower 95% CI of mean	76.39	0.1107	-0.9434	2.56
Upper 95% CI of mean	0	8.135	7.359	79.21		Upper 95% CI of mean	106.3	3.339	6.943	14.77
