# Supplementary material for: Micronuclei-based model system reveals functional consequences of chromothripsis in human cells
Source: eLife. 2019 Nov 28;8:e50292. doi: 10.7554/eLife.50292 (PMC6910827; doi:10.7554/eLife.50292)
Supplement: Figure 3—source data 1. [file elife-50292-fig3-data1.xlsx]

## Sheet: Figure 3
Figure 3e										Figure 3f				Figure 3g
	Lamin A/C PN +	Lamin B1 PN +	Lamin A/C MN +	Lamin B1 MN +	Lamin A/C PN -	Lamin B1 PN -	Lamin A/C MN -	Lamin B1 MN -			Lamin B1 (-)	Lamin B1 (+)			Lamin B1 (-)	Lamin B1 (+)
Mean	99.1	99.53	97.4	54.07	0.9	0.4667	2.6	45.93		Mean	1.994	2.847		Mean	2.63	4.844
Std. Deviation	1.015	0.4041	1.682	3.94	1.015	0.4041	1.682	3.94		Std. Deviation	0.7499	0.9961		Std. Deviation	0.5027	1.123
Std. Error	0.5859	0.2333	0.9713	2.275	0.5859	0.2333	0.9713	2.275		Std. Error	0.07425	0.09863		Std. Error	0.09859	0.2577
Lower 95% CI of mean	96.58	98.53	93.22	44.28	-1.621	-0.5373	-1.579	36.15		Lower 95% CI of mean	1.847	2.652		Lower 95% CI of mean	2.427	4.302
Upper 95% CI of mean	101.6	100.5	101.6	63.85	3.421	1.471	6.779	55.72		Upper 95% CI of mean	2.141	3.043		Upper 95% CI of mean	2.833	5.385
