# Supplementary material for: Micronuclei-based model system reveals functional consequences of chromothripsis in human cells
Source: eLife. 2019 Nov 28;8:e50292. doi: 10.7554/eLife.50292 (PMC6910827; doi:10.7554/eLife.50292)
Supplement: Figure 4—source data 1. [file elife-50292-fig4-data1.xlsx]

## Sheet: Figure 4
Figure 4c				Figure 4e				Figure 4f				Figure 4g
	RT	4°C			Lamin B +	Lamin B -			Lamin B +	Lamin B -			CLS-GFP +	CLS-GFP-
Mean	8.667	2.85		Mean	31.99	11.11		Mean	24.55	49.31		Mean	55.51	18.09
Std. Deviation	2.458	2.333		Std. Deviation	11.11	6.698		Std. Deviation	2.556	15.36		Std. Deviation	7.831	7.169
Std. Error	1.419	1.65		Std. Error	6.415	3.867		Std. Error	1.476	8.867		Std. Error	4.521	4.139
Lower 95% CI of mean	2.56	-18.12		Lower 95% CI of mean	4.389	-5.528		Lower 95% CI of mean	18.2	11.15		Lower 95% CI of mean	36.06	0.2773
Upper 95% CI of mean	14.77	23.82		Upper 95% CI of mean	59.59	27.75		Upper 95% CI of mean	30.9	87.46		Upper 95% CI of mean	74.97	35.9
