# Supplementary material for: Micronuclei-based model system reveals functional consequences of chromothripsis in human cells
Source: eLife. 2019 Nov 28;8:e50292. doi: 10.7554/eLife.50292 (PMC6910827; doi:10.7554/eLife.50292)
Supplement: Figure 5—source data 1. [file elife-50292-fig5-data1.xlsx]

## Sheet: Figure 5
Figure 5b															Figure 5c
	Htr5-16	Htr5-17	Htr5-18	Htr5-19	Htr8-05	Htr8-06	Htr8-07	Htr8-08	Htr13-02	Htr13-03	Htr18-01	Htr18-02				MN HCT116	AB HCT116	MN Hte5-01	AB Hte5-01	MN Htr5-16	AB Htr5-16	MN Htr5-17	AB Htr5-17	MN Htr5-18	AB Htr5-18	MN Htr5-19	AB Htr5-19	MN Htr13-02	AB Htr13-02	MN Htr13-03	AB Htr13-03	MN Htr18-01	AB Htr18-01	MN Htr18-02	AB Htr18-02
Mean	0.8702	0.41	0.3755	0.7899	0.5506	0.3702	0.7341	0.5546	0.7293	0.8831	0.787	0.9337			Mean	1.66	5.18	2.233	4.32	3.36	13.56	4.467	18.33	6.08	26.88	3.433	17.02	0.9033	10.86	1.977	9.508	1.527	10.5	1.47	8.295
Std. Deviation	0.08152	0.04685	0.2425	0.1152	0.322	0.04171	0.3484	0.1177	0.2244	0.02065	0.1797	0.1612			Std. Deviation	1.031	2.555	0.4149	3.765	1.547	4.179	2.61	16.36	3.707	7.78	1.633	5.109	0.5818	11.43	0.3675	0.9424	0.8151	11.02	1.11	10.27
Std. Error	0.04076	0.02342	0.1212	0.05762	0.1859	0.02408	0.2011	0.06793	0.1122	0.01032	0.08984	0.08058			Std. Error	0.4611	1.143	0.2395	2.174	0.6918	1.869	1.066	6.677	1.658	3.479	0.6667	2.285	0.3359	5.715	0.2122	0.4712	0.4706	6.364	0.6407	5.133
Lower 95% CI of mean	0.7404	0.3354	-0.01033	0.6065	-0.2492	0.2665	-0.1313	0.2623	0.3723	0.8503	0.501	0.6773			Lower 95% CI of mean	0.3798	2.008	1.203	-5.032	1.439	8.371	1.727	1.169	1.477	17.22	1.72	10.68	-0.542	-7.327	1.064	8.008	-0.4982	-16.88	-1.286	-8.039
Upper 95% CI of mean	0.9999	0.4845	0.7614	0.9732	1.351	0.4738	1.6	0.8468	1.086	0.916	1.073	1.19			Upper 95% CI of mean	2.94	8.352	3.264	13.67	5.281	18.75	7.206	35.5	10.68	36.54	5.147	23.36	2.349	29.05	2.89	11.01	3.552	37.88	4.226	24.63
5d colony formation / of anaphase bridges						5e colony formation / additional genomic material						5f additional genomic material / anaphase bridges							5 d,e,f column stats
	normalized colony formation	Anaphase bridges					normalized colony formation	additionalgenomic material					additionalgenomic material	Anaphase bridges						additional genomic material	normalized colony formation	anaphase bridges	micronuclei
Htr18-02	0.933731	8.295				Htr18-02	0.933731	100440520				Htr18-02	100440520	8.295					Mean	140800000	0.6972	13.25	2.828
Htr13-03	0.88315	9.5075				Htr13-03	0.88315	58582226				Htr13-03	58582226	9.5075					Std. Deviation	76560000	0.2636	6.685	1.667
Htr5-16	0.870164	13.56				Htr5-16	0.870164	118570702				Htr5-16	118570702	13.56					Std. Error	20460000	0.07045	2.228	0.5557
Htr5-19	0.789854	17.02				Htr5-19	0.789854	47219827				Htr5-19	47219827	17.02
Hte5-01	1.30901	4.32				Hte5-01	1.30901	135388507				Hte5-01	135388507	4.32					Lower 95% CI of mean	96580000	0.545	8.114	1.546
Htr18-01	0.786972	10.5				Htr18-01	0.786972	76659467				Htr18-01	76659467	10.5					Upper 95% CI of mean	185000000	0.8494	18.39	4.109
Htr13-02	0.729317	10.86				Htr13-02	0.729317	96605350				Htr13-02	96605350	10.86
Htr5-17	0.409967	18.3333				Htr5-17	0.409967	182302242				Htr5-17	182302242	18.3333
Htr5-18	0.375536	26.88				Htr5-18	0.375536	180934619				Htr5-18	180934619	26.88					5 d,e,f correlation matrix spearman rank
						Hte5-04	0.463333	360937728												additional genomic material	normalized colony formation	anaphase bridges	micronuclei
						Htr8-05_G	0.550646	151096075											additional genomic material		-0.727472	0.283333	0.466667
with rearrangements						Htr8-06_G	0.370168	154451531											normalized colony formation	-0.727472		-0.866667	-0.416667
						Htr8-07_G	0.734145	149564727											anaphase bridges	0.283333	-0.866667		0.716667
						Htr8-08_G	0.554557	158322147											micronuclei	0.466667	-0.416667	0.716667
																			5 d,e,f correlation matrix p values
																				additional genomic material	normalized colony formation	anaphase bridges	micronuclei
																			additional genomic material		0.00319062	0.462991	0.212522
																			normalized colony formation	0.00319062		0.00450838	0.269582
																			anaphase bridges	0.462991	0.00450838		0.0368662
																			micronuclei	0.212522	0.269582	0.0368662
