# Supplementary material for: Micronuclei-based model system reveals functional consequences of chromothripsis in human cells
Source: eLife journal article supplement (doi:10.7554/elife.50292), 2019-11-28
Supplement: supp [file elife_poa_e50292_Figure_1_figure_supplement_2.pdf › elife_poa_e50292_Figure_1_figure_supplement_2.pdf]

**Copy Number** 0 1 2 or unknown 3 4 or more

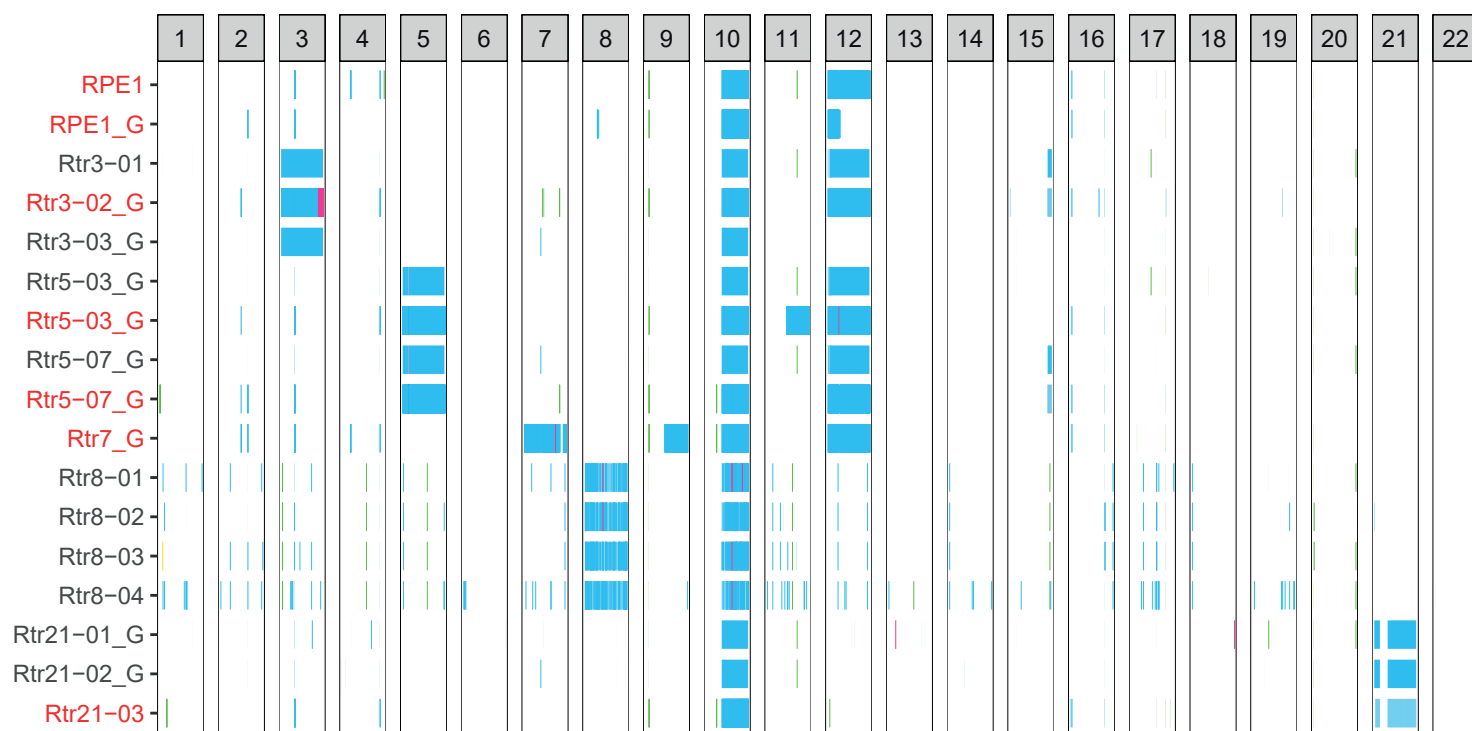

Kneissig et al

## Figure 1 - Figure Supplement 2

SNP and SMASH array analysis shows stable addition of the extra chromosome to HCT116 and RPE1 acceptor cells. Each column represents one chromosome, each row one dataset from SNP array (black) or SMASH (red) analyses. The chromosome copy number is colour-coded. Only autosomes are visualized. Please note that chromosome 12 is frequent spontaneously gained in RPE1 cell line.
