# Supplementary material for: Micronuclei-based model system reveals functional consequences of chromothripsis in human cells
Source: eLife journal article supplement (doi:10.7554/elife.50292), 2019-11-28
Supplement: supp [file elife_poa_e50292_Figure_1_figure_supplement_3.pdf › elife_poa_e50292_Figure_1_figure_supplement_3.pdf]

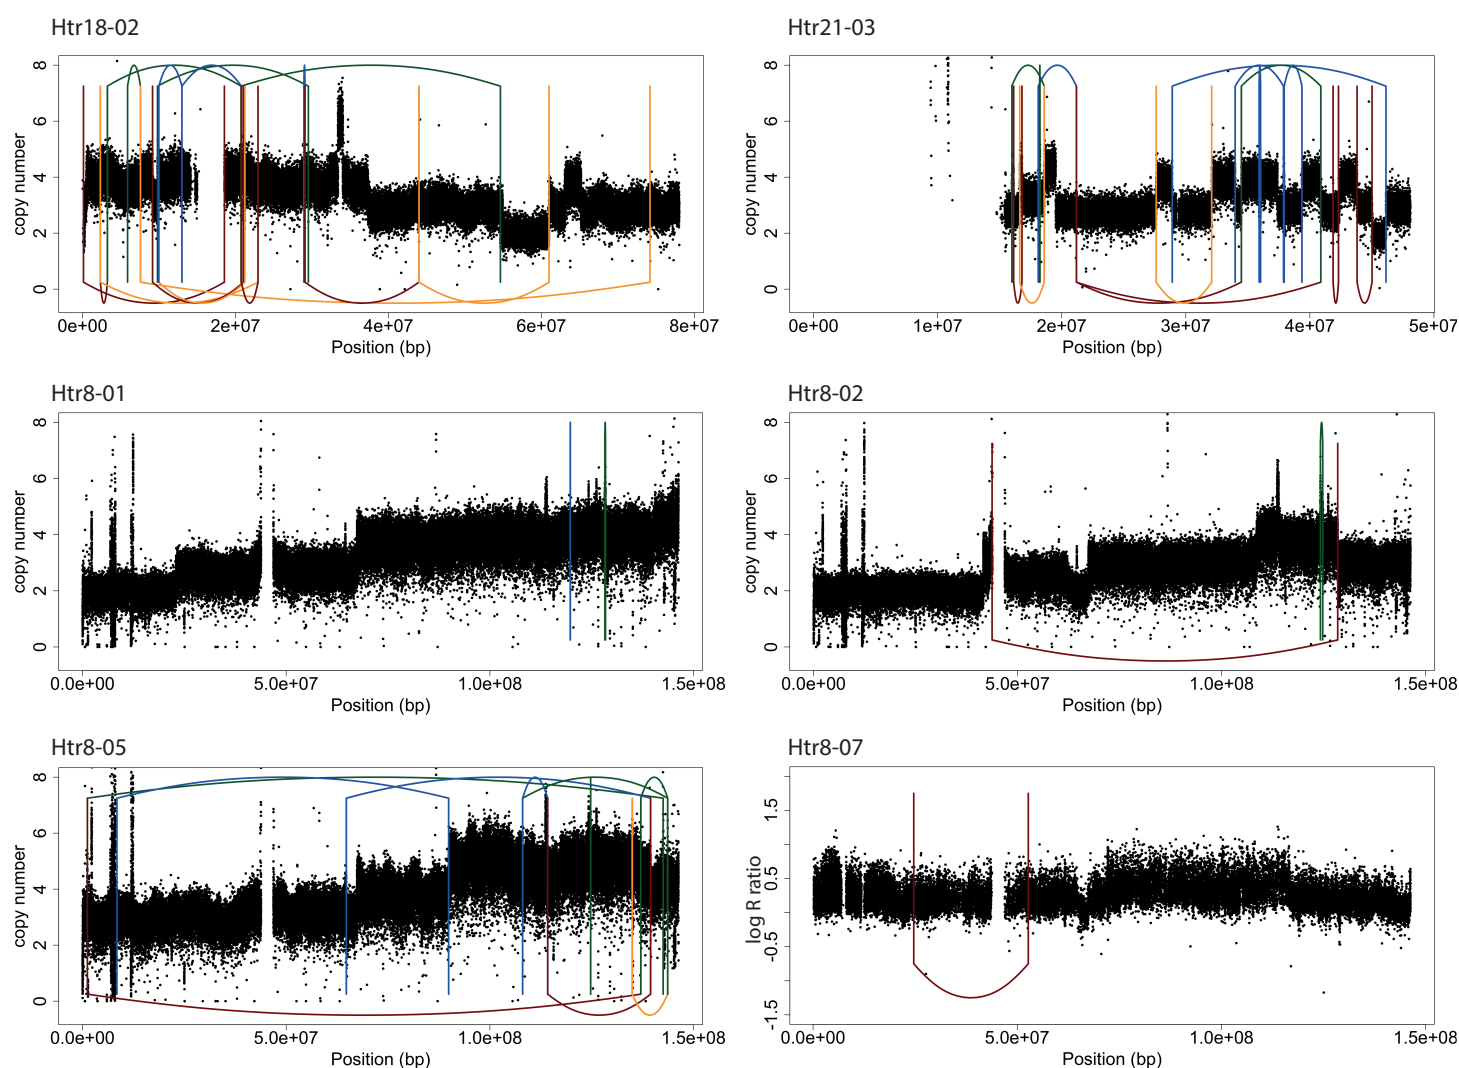

Kneissig et al

**Figure 1 - Figure Supplement 3| Copy number and structural rearrangement breakpoint junctions for cell lines analyzed by whole genome sequencing.** Plots show the breakpoint junctions (solid lines) and CNAs (black dots) detected by WGS. Lines are colored according to the orientation of the breakpoint junction, from low to high chromosomal coordinate: tail-head (blue), head-tail (green), head-head (orange), tail-tail (red).
