# Supplementary material for: Micronuclei-based model system reveals functional consequences of chromothripsis in human cells
Source: eLife journal article supplement (doi:10.7554/elife.50292), 2019-11-28
Supplement: supp [file elife_poa_e50292_Figure_5_figure_supplement_1.pdf › elife_poa_e50292_Figure_5_figure_supplement_1.pdf]

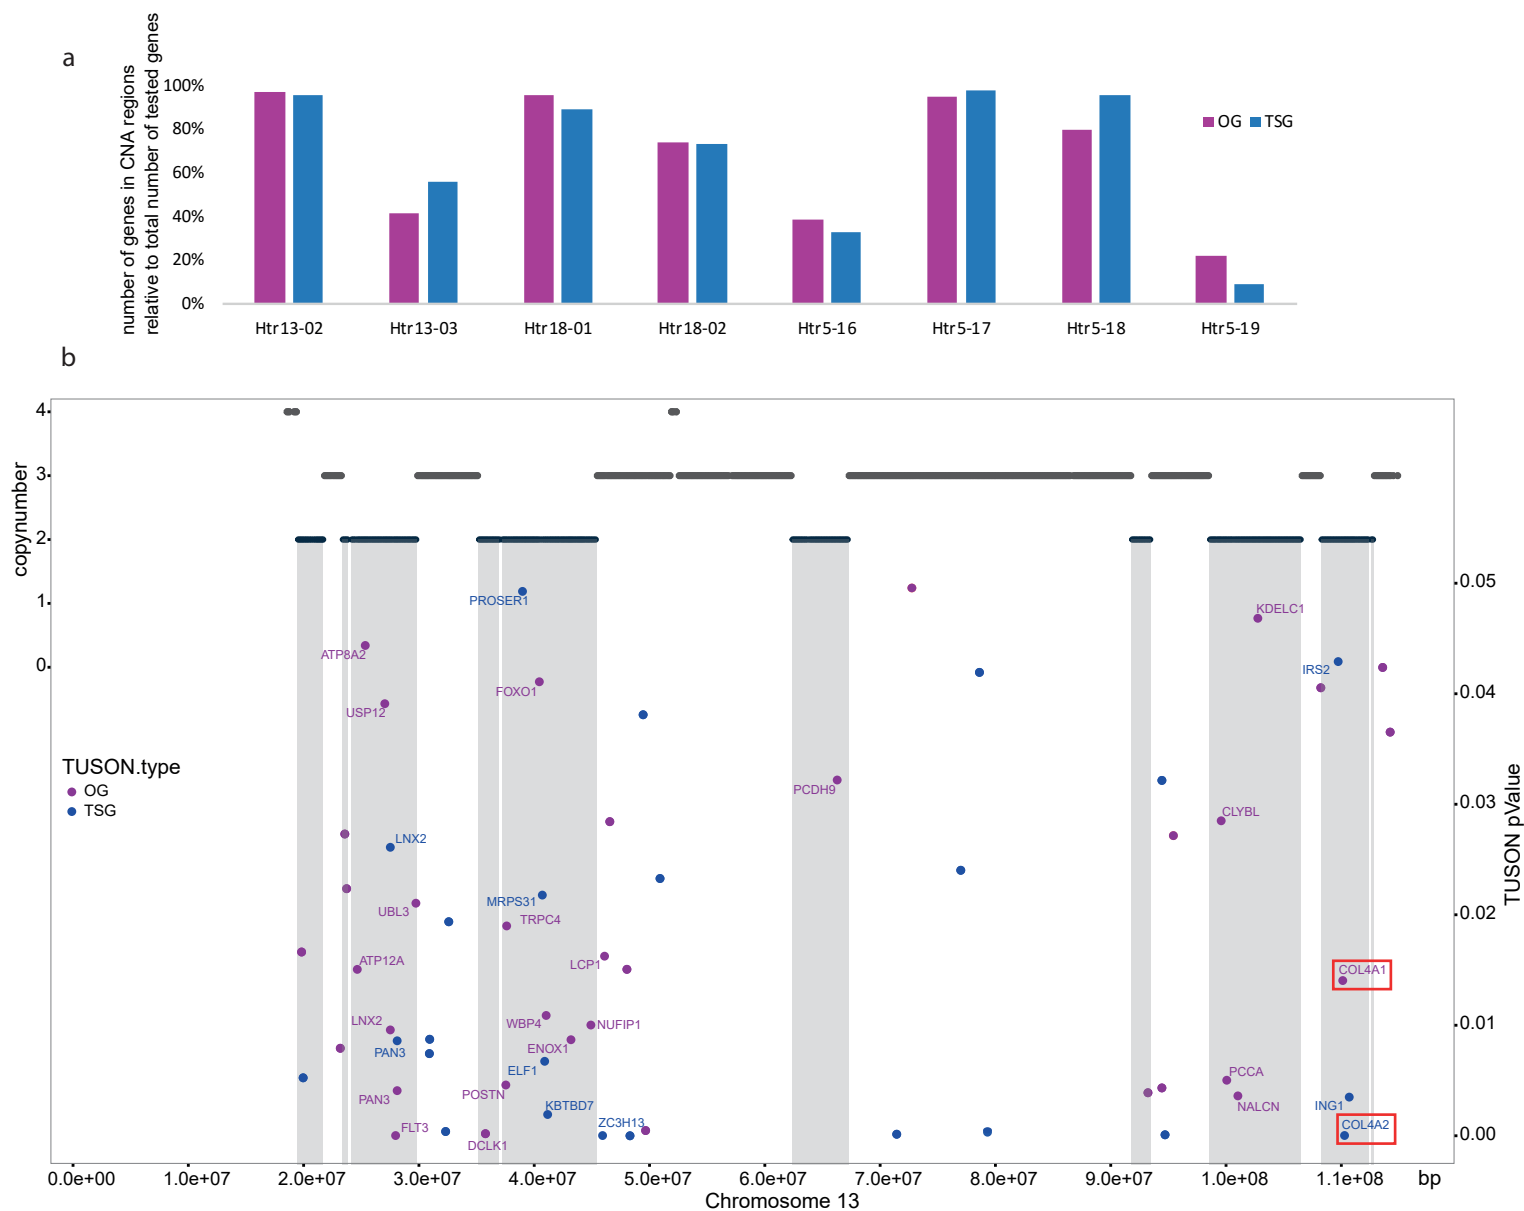

Kneissig et al **Figure 5 - Figure Supplement 1**

**Gene-specific changes** a) Percentage of TSGs and OGs as defined by the TUSON explorer with a TUSON p value < 0.05 that overlap with the CNA regions on the transferred chromosome of the samples Htr13-02, Htr13-03, Htr18-01, Htr13-02, Htr5-16, Htr5-17, Htr5-18 and Htr5-19. Number of included genes: chr. 5 - TSG: 45, OG: 85; chr. 13 - OG: 36, TSG: 25; chr. 18 - OG: 23, TSG: 19. Reference genome: GRCh38. b) CNA of the sample Htr13-03 (top, y-axis: left) and overlapping TUSON genes with TUSON p Value (bottom, y-axis: right). Gene names are added only for the genes with the CN state 2. TSGs and OGs are color-coded as defined in the legend. COL4A1 and COL4A2 are marked with a red rectangle.
