# Supplementary material for: Micronuclei-based model system reveals functional consequences of chromothripsis in human cells
Source: eLife journal article supplement (doi:10.7554/elife.50292), 2019-11-28
Supplement: supp [file elife_poa_e50292_Figure_5_figure_supplement_2.pdf › elife_poa_e50292_Figure_5_figure_supplement_2.pdf]

a

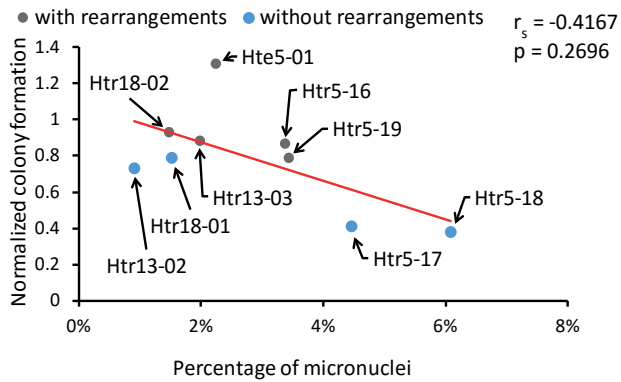

b

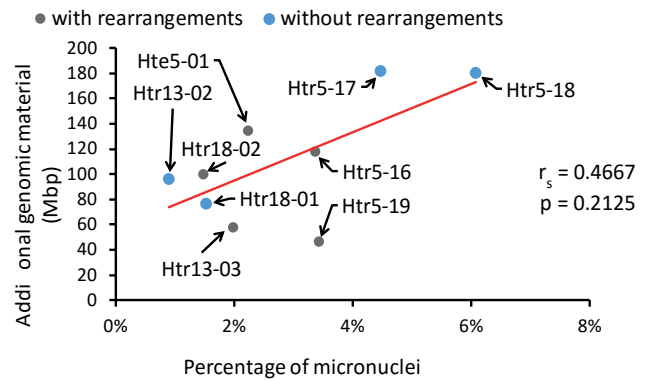

Kneissig et al

**Figure 5 - Figure Supplement 2 Correlation of colony forming capacity**

(a) The normalized colony forming capacity of the cell lines relative to the percentage of MN in trisomic and tetrasomic samples. (b) The amount of additional genomic material in trisomic and tetrasomic samples relative to with the percentage of MN. The cell lines with chromothripsis-like rearrangements on the extra chromosome are marked in grey, the cell lines without rearrangements are in blue. Data in (a) and (b) were evaluated using Spearman Rank Correlation. Correlation coefficient ( $r_s$ ) and two-tailed p-values (p) were calculated.
