# Supplementary material for: Micronuclei-based model system reveals functional consequences of chromothripsis in human cells
Source: eLife. 2019 Nov 28;8:e50292. doi: 10.7554/eLife.50292 (PMC6910827; doi:10.7554/eLife.50292)
Supplement: Supplementary file 2. [file elife-50292-supp2.xlsx]

## Sheet: Table 2
Supplementary File 2 | List of all identified copy number aberrations.
(a) Affected chromosome
(b) Start of breakpoint junction
(c) Stop of breakpoint junction
(d) Type of rearrangement
(e) Samples
(f) Additional information
CHROM (a)	START (b)	STOP (c)	TYPE (d)	# SAMPLES (e)	INFO (f)
chr2	141624367	142224902	Loss	34	Htr21-01-SMASH:141760314-142161249;Htr8-12-SNPARRAY:141709024-142193511;Htr5-18-SNPARRAY:141709024-142224902;Hwt-2-SNPARRAY:141709024-142209491;Htr8-15-SNPARRAY:141709024-142209491;Htr8-7-SNPARRAY:141696710-142199715;Htr8-1-SNPARRAY:141709024-142209491;Htr5-13-SNPARRAY:141709024-142224902;Htr5-17-SNPARRAY:141709024-142209491;Htr8-14-SNPARRAY:141709024-142193511;Htr5-14-SNPARRAY:141709024-14219351…
chr2	205373386	205897983	Loss	31	Htr21-01-SMASH:205501796-205897983;Htr8-12-SNPARRAY:205420680-205796826;Htr5-18-SNPARRAY:205489010-205796826;Hwt-2-SNPARRAY:205420680-205796826;Htr8-15-SNPARRAY:205420680-205796826;Htr8-7-SNPARRAY:205493618-205796886;Htr8-1-SNPARRAY:205420680-205796826;Htr5-13-SNPARRAY:205420680-205796826;Htr5-17-SNPARRAY:205388660-205796826;Htr8-14-SNPARRAY:205420680-205796826;Htr5-14-SNPARRAY:205381978-20579682…
chr3	60019320	61076746	Loss	18	Htr21-01-SMASH:60147076-61076746;Htr18-02-SMASH:60019320-60804213;Htr21-03-SMASH:60147076-60804213;Htr5-18-SNPARRAY:60224573-60856191;Htr5-13-SNPARRAY:60224573-60856191;Htr5-17-SNPARRAY:60224573-60856191;Htr8-19-SNPARRAY:60224573-60833438;Htr5-14-SNPARRAY:60232479-60856191;Htr5-14-SMASH:60246178-60827644;Htr5-16-SNPARRAY:60224573-60833438;Htr5-17-SMASH:60195862-60775321;Htr8-3-SNPARRAY:60224573-6…
chr3	97744058	99061207	Gain	29	Htr21-01-SMASH:98193182-98767211;Htr8-12-SNPARRAY:98124968-98793100;Hwt-2-SNPARRAY:98124968-98907385;Htr8-15-SNPARRAY:98124968-98778161;Htr8-7-SNPARRAY:98127043-98603244;Htr8-1-SNPARRAY:98124968-98878860;Htr5-13-SNPARRAY:98017733-98802003;Htr8-14-SNPARRAY:98155577-98778161;Htr5-12-SNPARRAY:98155577-98778161;Htr8-13-SNPARRAY:98124968-98713365;Htr8-15-SNPARRAY:98124968-98802003;Htr18-02-SMASH:98043…
chr3	188897014	189343611	Gain	28	Htr21-01-SMASH:188946179-189343611;Htr8-12-SNPARRAY:188906324-189273056;Hwt-2-SNPARRAY:188906324-189273056;Htr8-15-SNPARRAY:188906324-189273056;Htr8-7-SNPARRAY:188904257-189285574;Htr8-1-SNPARRAY:188906324-189273056;Htr5-13-SNPARRAY:188906324-189273056;Htr8-14-SNPARRAY:188906324-189273056;Hte5-1-SNPARRAY:188920916-189273056;Htr8-4-SNPARRAY:188920916-189273056;Htr8-13-SNPARRAY:188906324-189273056;…
chr4	19424186	19970921	Loss	23	Htr21-01-SMASH:19424186-19830218;Htr18-01-SMASH:19424186-19830218;Htr5-11-SMASH:19424186-19830218;Htr5-15-SMASH:19535151-19856881;Htr8-12-SNPARRAY:19561100-19827280;Htr8-15-SNPARRAY:19561100-19827280;Htr8-7-SNPARRAY:19561100-19829439;Hte5-1-SNPARRAY:19547695-19850660;Htr8-16-SNPARRAY:19561100-19827280;Htr8-26-SNPARRAY:19561100-19827280;Htr18-02-SMASH:19560127-19970921;Htr13-02-SMASH:19560127-1997…
chr4	184270725	185786417	Loss	34	Htr21-01-SMASH:184415952-185651902;Htr8-12-SNPARRAY:184311187-185687462;Htr5-18-SNPARRAY:184311187-185681217;Hwt-2-SNPARRAY:184311187-185687462;Htr8-15-SNPARRAY:184311187-185687462;Htr8-7-SNPARRAY:184313834-185682671;Htr8-1-SNPARRAY:184311187-185681217;Htr5-13-SNPARRAY:184311187-185687462;Htr5-17-SNPARRAY:184311187-185681217;Htr8-14-SNPARRAY:184311187-185687462;Htr5-14-SNPARRAY:184303766-18568121…
chr5	3502107	3885064	Loss	1	Htr21-01-SMASH:3502107-3885064
chr6	1781214	2342406	Loss	34	Htr21-01-SMASH:1808729-2342406;Htr8-12-SNPARRAY:1782631-2270922;Htr5-18-SNPARRAY:1782631-2270922;Hwt-2-SNPARRAY:1782631-2270922;Htr8-15-SNPARRAY:1782631-2270922;Htr8-7-SNPARRAY:1783863-2262664;Htr8-1-SNPARRAY:1782631-2270922;Htr5-13-SNPARRAY:1782631-2270922;Htr5-17-SNPARRAY:1782631-2270922;Htr8-14-SNPARRAY:1782631-2270922;Htr5-14-SNPARRAY:1782631-2270922;Hte5-1-SNPARRAY:1782631-2270922;Hte5-17-SN…
chr8	67177613	146364022	Gain	18	Htr21-01-SMASH:67403125-146132019;Htr5-18-SNPARRAY:67344526-146364022;Hwt-2-SNPARRAY:67344526-146364022;Htr5-13-SNPARRAY:67344526-146364022;Htr5-17-SNPARRAY:67344526-146364022;Htr5-14-SNPARRAY:67344526-146364022;Hte5-1-SNPARRAY:67286221-146364022;Hte5-17-SNPARRAY:67344526-146364022;Hte5-16-SNPARRAY:67344526-146364022;Htr5-14-SMASH:67393469-113470297;Htr5-14-SMASH:113634880-146364022;Htr5-16-SNPAR…
chr10	100003408	131564152	Gain	34	Htr21-01-SMASH:99982453-131108042;Htr8-12-SNPARRAY:99758388-131361249;Htr5-18-SNPARRAY:100140994-131350797;Hwt-2-SNPARRAY:100061123-131361249;Htr8-15-SNPARRAY:99758388-131350797;Htr8-7-SNPARRAY:100028346-131361249;Htr8-1-SNPARRAY:100034249-131361249;Htr5-13-SNPARRAY:100140994-131350797;Htr5-17-SNPARRAY:100140994-131350797;Htr8-14-SNPARRAY:99974329-131361249;Htr5-14-SNPARRAY:100140994-131350797;Ht…
chr10	131108042	135534747	Loss	34	Htr21-01-SMASH:131108042-135294790;Htr8-12-SNPARRAY:131361249-135534747;Htr5-18-SNPARRAY:131350797-135534747;Hwt-2-SNPARRAY:131361249-135534747;Htr8-15-SNPARRAY:131350797-135534747;Htr8-7-SNPARRAY:131361249-135534747;Htr8-1-SNPARRAY:131361249-135534747;Htr5-13-SNPARRAY:131350797-135534747;Htr5-17-SNPARRAY:131350797-135534747;Htr8-14-SNPARRAY:131361249-135534747;Htr5-14-SNPARRAY:131350797-13553474…
chr12	66057243	67021132	Gain	34	Htr21-01-SMASH:66328220-67021132;Htr8-12-SNPARRAY:66233886-66946883;Htr5-18-SNPARRAY:66242700-66946883;Hwt-2-SNPARRAY:66242700-66946883;Htr8-7-SNPARRAY:66248868-66927559;Htr8-1-SNPARRAY:66242700-66944748;Htr5-13-SNPARRAY:66242700-66946883;Htr5-17-SNPARRAY:66242700-66946883;Htr8-14-SNPARRAY:66242700-66946883;Htr5-14-SNPARRAY:66242700-66946883;Hte5-1-SNPARRAY:66242700-66946883;Hte5-17-SNPARRAY:6624…
chr12	76105865	76911326	Loss	34	Htr21-01-SMASH:76105865-76655177;Htr8-12-SNPARRAY:76119585-76735024;Htr5-18-SNPARRAY:76119585-76718871;Hwt-2-SNPARRAY:76119585-76718871;Htr8-15-SNPARRAY:76119585-76718871;Htr8-7-SNPARRAY:76123526-76716520;Htr8-1-SNPARRAY:76119585-76718871;Htr5-13-SNPARRAY:76119585-76718871;Htr5-17-SNPARRAY:76119585-76718871;Htr8-14-SNPARRAY:76119585-76735024;Htr5-14-SNPARRAY:76119585-76718871;Hte5-1-SNPARRAY:7611…
chr16	0	825027	Loss	34	Htr21-01-SMASH:237329-825027;Htr5-14-SMASH:137376-740225;Htr18-02-SMASH:237329-690856;Htr13-02-SMASH:237329-690856;Htr18-01-SMASH:237329-690856;Htr13-03-SMASH:237329-690856;Htr5-12-SMASH:237329-690856;Htr5-11-SMASH:237329-690856;Htr5-17-SMASH:137376-740225;Htr5-13-SMASH:137376-740225;Htr5-18-SMASH:137376-740225;Htr21-03-SMASH:237329-690856;Htr8-12-SNPARRAY:0-212488;Htr8-12-SNPARRAY:231586-730265;…
chr16	6146260	7247516	Loss	30	Htr21-01-SMASH:6313755-6979636;Htr8-12-SNPARRAY:6220795-7141365;Htr5-18-SNPARRAY:6220795-7130608;Htr8-15-SNPARRAY:6220795-7141365;Htr8-7-SNPARRAY:6222614-7141829;Htr5-13-SNPARRAY:6220795-7141365;Htr5-17-SNPARRAY:6220795-7130608;Htr8-19-SNPARRAY:6220795-7141365;Htr5-14-SNPARRAY:6220795-7130608;Htr5-12-SNPARRAY:6220795-7130608;Htr5-11-SNPARRAY:6220795-7141365;Htr5-14-SMASH:6249897-7157235;Htr8-16-S…
chr16	78233948	79079909	Loss	20	Htr21-01-SMASH:78429982-79079909;Htr13-02-SMASH:78429982-78949288;Htr5-11-SMASH:78429982-79079909;Htr5-15-SMASH:78233948-78964694;Htr5-18-SMASH:78233948-78912388;Htr13-03-SMASH:78560473-78949288;Htr5-14-SMASH:78233948-78809272;Htr5-16-SMASH:78233948-78755823;Htr8-19-SNPARRAY:78263809-78746972;Htr8-12-SNPARRAY:78263809-78728123;Htr5-18-SNPARRAY:78263809-78728123;Htr5-13-SNPARRAY:78270188-78728123;…
chr16	78910941	90354753	Gain	34	Htr21-01-SMASH:79079909-90013537;Htr8-12-SNPARRAY:78934054-90354753;Htr5-18-SNPARRAY:79053966-90354753;Hwt-2-SNPARRAY:78925854-90354753;Htr8-15-SNPARRAY:78934054-90354753;Htr8-7-SNPARRAY:78936854-90354753;Htr8-1-SNPARRAY:79030944-90354753;Htr5-13-SNPARRAY:79053966-90354753;Htr5-17-SNPARRAY:79079648-90354753;Htr8-14-SNPARRAY:78934054-90354753;Htr5-14-SNPARRAY:79053966-90354753;Hte5-1-SNPARRAY:7903…
chr17	43383334	81195210	Gain	33	Htr21-01-SMASH:43654896-81195210;Htr8-12-SNPARRAY:43464348-81195210;Htr5-18-SNPARRAY:43974458-81195210;Hwt-2-SNPARRAY:43896636-81195210;Htr8-15-SNPARRAY:43464348-81195210;Htr8-7-SNPARRAY:43443468-44219157;Htr8-7-SNPARRAY:44798933-81195210;Htr8-1-SNPARRAY:43815901-81195210;Htr5-13-SNPARRAY:43974458-81195210;Htr5-17-SNPARRAY:43974458-81195210;Htr8-14-SNPARRAY:43464348-81195210;Htr5-14-SNPARRAY:4397…
chr20	14854178	15251620	Loss	1	Htr21-01-SMASH:14854178-15251620
chr2	89734238	90247720	Loss	9	Htr8-12-SNPARRAY:89734238-90247720;Htr8-15-SNPARRAY:89734238-90247720;Htr8-1-SNPARRAY:89734238-90247720;Htr5-13-SNPARRAY:89734238-90247720;Htr8-14-SNPARRAY:89734238-90247720;Hte5-1-SNPARRAY:89734238-90247720;Htr8-13-SNPARRAY:89734238-90247720;Htr8-15-SNPARRAY:89734238-90247720;Htr8-11-SNPARRAY:89734238-90247720;Htr8-16-SNPARRAY:89734238-90247720;Htr8-11-SNPARRAY:89734238-90247720
chr2	141316119	141709024	Gain	3	Htr8-12-SNPARRAY:141354751-141709024;Htr8-15-SNPARRAY:141381501-141709024;Htr8-14-SNPARRAY:141316119-141709024
chr3	60224573	60497477	Loss	8	Htr8-12-SNPARRAY:60224573-60497216;Htr8-15-SNPARRAY:60224573-60497216;Htr8-1-SNPARRAY:60224573-60497216;Hte5-1-SNPARRAY:60224573-60497216;Htr8-13-SNPARRAY:60224573-60497216;Htr8-15-SNPARRAY:60224573-60497216;Htr8-2-SNPARRAY:60224976-60497477;Htr8-11-SNPARRAY:60224573-60497216;Htr8-16-SNPARRAY:60224573-60497216
chr3	60590024	60856191	Loss	18	Htr8-12-SNPARRAY:60590689-60833438;Hwt-2-SNPARRAY:60590689-60833438;Htr8-15-SNPARRAY:60590689-60856191;Htr8-7-SNPARRAY:60590024-60828976;Htr8-1-SNPARRAY:60590689-60833438;Hte5-1-SNPARRAY:60590689-60833438;Hte5-17-SNPARRAY:60590689-60856191;Htr8-4-SNPARRAY:60590689-60833438;Hte5-16-SNPARRAY:60590689-60856191;Htr8-13-SNPARRAY:60590689-60856191;Htr8-15-SNPARRAY:60590689-60856191;Htr8-8-SNPARRAY:6059…
chr3	111580146	112082634	Gain	9	Htr8-12-SNPARRAY:111590948-111924362;Htr8-15-SNPARRAY:111590948-111924362;Htr8-1-SNPARRAY:111580146-112039842;Htr8-14-SNPARRAY:111580146-112002353;Htr8-13-SNPARRAY:111580146-111924362;Htr8-15-SNPARRAY:111590948-112002353;Htr8-11-SNPARRAY:111590948-111924362;Htr5-18-SNPARRAY:111596546-112082634;Htr5-13-SNPARRAY:111596546-112082634;Htr8-16-SNPARRAY:111580146-112082634
chr3	187886022	188136440	Gain	11	Htr8-12-SNPARRAY:187892052-188136440;Htr8-15-SNPARRAY:187892052-188136440;Htr8-7-SNPARRAY:187894102-188128865;Htr8-1-SNPARRAY:187941920-188136440;Htr8-13-SNPARRAY:187892052-188136440;Htr8-15-SNPARRAY:187892052-188136440;Htr8-8-SNPARRAY:187894102-188114523;Htr8-6-SNPARRAY:187896630-188123874;Htr8-11-SNPARRAY:187941920-188136440;Htr8-16-SNPARRAY:187886022-188136440;Htr8-11-SNPARRAY:187892052-188136…
chr4	91214669	91642334	Loss	26	Htr8-12-SNPARRAY:91321066-91604671;Hwt-2-SNPARRAY:91321066-91604671;Htr8-15-SNPARRAY:91321066-91604671;Htr8-7-SNPARRAY:91313281-91618703;Htr8-1-SNPARRAY:91321066-91604671;Htr5-13-SNPARRAY:91356113-91604671;Htr8-14-SNPARRAY:91356113-91604671;Htr5-14-SNPARRAY:91321066-91604671;Hte5-1-SNPARRAY:91321066-91604671;Htr8-4-SNPARRAY:91324253-91612020;Htr5-14-SMASH:91347965-91569325;Htr8-13-SNPARRAY:913210…
chr4	91604671	92319815	Gain	28	Htr8-12-SNPARRAY:91604671-92094388;Hwt-2-SNPARRAY:91619174-92000285;Htr8-15-SNPARRAY:91604671-92016883;Htr8-7-SNPARRAY:91718803-92159027;Hte5-1-SNPARRAY:91604671-92208235;Htr8-4-SNPARRAY:91669476-92118205;Hte5-19-SMASH:91746412-92148623;Htr8-16-SNPARRAY:91604671-92016883;Htr8-26-SNPARRAY:91604671-92003681;Htr18-02-SMASH:91642334-92057907;Htr18-01-SMASH:91642334-92213533;Htr8-6-SNPARRAY:91718803-9…
chr5	115111528	115570207	Gain	21	Htr8-12-SNPARRAY:115218331-115510680;Hwt-2-SNPARRAY:115186903-115510680;Htr8-15-SNPARRAY:115218331-115467783;Htr8-7-SNPARRAY:115218331-115440207;Htr8-1-SNPARRAY:115218331-115445647;Htr8-14-SNPARRAY:115218331-115424463;Htr8-4-SNPARRAY:115218331-115510680;Htr8-13-SNPARRAY:115218331-115445647;Htr8-15-SNPARRAY:115218331-115424463;Htr18-01-SMASH:115111528-115522689;Htr8-8-SNPARRAY:115231420-115440207;…
chr9	139921116	140217912	Gain	1	Htr8-12-SNPARRAY:139921116-140217912
chr12	75866681	76135792	Gain	14	Htr8-12-SNPARRAY:76006615-76119585;Htr8-7-SNPARRAY:76004504-76123526;Htr8-1-SNPARRAY:75980353-76118894;Htr8-13-SNPARRAY:76006615-76119585;Htr8-15-SNPARRAY:76006615-76119585;Htr8-8-SNPARRAY:76004504-76123526;Htr8-2-SNPARRAY:75981419-76119063;Htr8-3-SNPARRAY:75999709-76122064;Htr8-11-SNPARRAY:76006615-76119585;Htr8-11-SNPARRAY:76006615-76119585;Htr8-5-SNPARRAY:76004504-76123526;Htr5-15-SMASH:759742…
chr16	730265	871289	Gain	1	Htr8-12-SNPARRAY:730265-871289
chr16	21583230	21959910	Loss	27	Htr8-12-SNPARRAY:21595141-21845823;Htr5-18-SNPARRAY:21595141-21845823;Htr8-15-SNPARRAY:21595141-21845823;Htr8-7-SNPARRAY:21593430-21894231;Htr8-1-SNPARRAY:21595141-21845823;Htr5-13-SNPARRAY:21595141-21845823;Htr5-17-SNPARRAY:21595141-21845823;Htr8-14-SNPARRAY:21595141-21845823;Htr5-14-SNPARRAY:21595141-21845823;Htr5-12-SNPARRAY:21595141-21845823;Htr5-11-SNPARRAY:21595141-21845823;Htr5-14-SMASH:21…
chr18	0	270726	Loss	17	Htr8-12-SNPARRAY:0-266464;Htr8-15-SNPARRAY:0-266464;Htr8-7-SNPARRAY:0-268871;Htr8-1-SNPARRAY:0-270726;Htr5-13-SNPARRAY:0-266464;Htr8-14-SNPARRAY:0-266464;Htr8-4-SNPARRAY:0-270726;Htr8-13-SNPARRAY:0-266464;Htr8-15-SNPARRAY:0-266464;Htr8-8-SNPARRAY:0-268871;Htr8-6-SNPARRAY:0-268871;Htr8-2-SNPARRAY:0-266464;Htr8-3-SNPARRAY:0-266464;Htr8-11-SNPARRAY:0-266464;Htr5-15-SMASH:0-261075;Htr8-16-SNPARRAY:0-…
chr19	20652593	21180288	Loss	28	Htr8-12-SNPARRAY:20677214-21028773;Htr5-18-SNPARRAY:20677214-21028773;Hwt-2-SNPARRAY:20677214-21028773;Htr8-15-SNPARRAY:20677214-21028773;Htr8-7-SNPARRAY:20660547-21009150;Htr8-1-SNPARRAY:20677214-21028773;Htr5-13-SNPARRAY:20677214-21028773;Htr5-17-SNPARRAY:20677214-21028773;Htr8-14-SNPARRAY:20677214-21028773;Htr5-14-SNPARRAY:20677214-21028773;Hte5-1-SNPARRAY:20677214-21028773;Hte5-17-SNPARRAY:20…
chr2	132252570	133027422	Gain	3	Rtr5-03_GS-SMASH:132252570-132987286;Rtr12_S-SMASH:132343552-133027422;Rtr5_GS-SMASH:132252570-132987286
chr3	60775321	62408514	Gain	13	Rtr5-03_GS-SMASH:60936061-62326704;Rtr21_S-SMASH:60827644-62326704;Rtr5-7-SNPARRAY:60809810-62408514;Rwt-1-SMASH:60827644-62326704;Rtr21-3-SNPARRAY:60833438-62323048;Rwt-1-SNPARRAY:60833438-62323048;Rwt-2-SMASH:60827644-62326704;Rtr12_GS-SMASH:60879831-62326704;Rtr12_S-SMASH:60827644-62326704;Rtr5_GS-SMASH:60879831-62275048;Rtr5-3-SNPARRAY:60809810-62323048;Rtr3_GS-SMASH:60775321-62377615;Rtr7_S-…
chr4	164968643	165625099	Gain	8	Rtr5-03_GS-SMASH:165142975-165560474;Rwt-1-SNPARRAY:165031340-165447455;Rtr3_GS-SMASH:165032294-165625099;Rtr21_S-SMASH:165032294-165430573;Rwt-2-SMASH:165032294-165430573;Rtr12_GS-SMASH:164968643-165499769;Rtr12_S-SMASH:165032294-165430573;Rtr7_S-SMASH:165032294-165430573
chr5	23274338	26299142	Gain	8	Rtr5-03_GS-SMASH:23491197-26242361;Rtr5_GS-SMASH:23718305-26242361;Htr5-12-SMASH:23622631-26288287;Htr5-11-SMASH:23622631-26288287;Htr5-17-SMASH:23274338-26299142;Htr5-15-SMASH:23491197-26242361;Htr5-13-SMASH:23603456-26299142;Htr5-16-SMASH:23662390-26299142
chr9	21923100	22440054	Loss	15	Rtr5-03_GS-SMASH:21992210-22384864;Rtr21_S-SMASH:21936248-22384864;Rtr3-2-SNPARRAY:21948727-22360093;Rtr5-7-SNPARRAY:21935086-22360093;Rwt-1-SMASH:21992210-22440054;Rtr3-1-SNPARRAY:21935086-22360093;Rtr21-3-SNPARRAY:21948727-22360093;Rwt-1-SNPARRAY:21948727-22360093;Rwt-2-SMASH:21936248-22384864;Rtr12_GS-SMASH:21936248-22384864;Rtr12_S-SMASH:21936248-22325142;Rtr5_GS-SMASH:21936248-22384864;Rtr5-…
chr10	61731240	135534747	Gain	15	Rtr5-03_GS-SMASH:62481018-135379885;Rtr21_S-SMASH:62582381-135379885;Rtr3-2-SNPARRAY:62103809-135534747;Rtr5-7-SNPARRAY:62544027-135534747;Rwt-1-SMASH:62481018-135379885;Rtr3-1-SNPARRAY:62544027-135534747;Rtr21-3-SNPARRAY:61731240-135534747;Rwt-1-SNPARRAY:62008923-135534747;Rwt-2-SMASH:62531930-135379885;Rtr12_GS-SMASH:62531930-135379885;Rtr12_S-SMASH:62531930-135379885;Rtr5_GS-SMASH:62481018-780…
chr11	62598876	135006516	Gain	1	Rtr5-03_GS-SMASH:62598876-135006516
chr12	0	133851895	Gain	8	Rtr5-03_GS-SMASH:0-133851895;Rtr5-7-SNPARRAY:1-133851895;Rtr3-1-SNPARRAY:1-133851895;Rwt-2-SMASH:0-133851895;Rtr5_GS-SMASH:0-133851895;Rtr5-3-SNPARRAY:1-133851895;Rtr3_GS-SMASH:0-133851895;Rtr7_S-SMASH:0-133851895
chr16	31549731	34421857	Gain	8	Rtr5-03_GS-SMASH:31955467-34188729;Rtr21_S-SMASH:31549731-34236617;Rwt-1-SMASH:32271970-34292106;Rwt-2-SMASH:31955467-33996197;Rtr12_S-SMASH:31889028-33996197;Rtr5_GS-SMASH:31955467-34188729;Rtr3_GS-SMASH:31955467-34236617;Rtr7_S-SMASH:31955467-34421857
chr16	77592341	78170530	Gain	10	Rtr5-03_GS-SMASH:77643733-78128422;Rtr21_S-SMASH:77643733-78071978;Htr8-15-SNPARRAY:77741083-78170530;Rwt-1-SMASH:77643733-78128422;Rwt-2-SMASH:77695486-78128422;Rtr12_GS-SMASH:77643733-78071978;Rtr12_S-SMASH:77643733-78128422;Rtr5_GS-SMASH:77643733-78128422;Rtr3_GS-SMASH:77643733-78128422;Rtr7_S-SMASH:77592341-78128422
chr17	61203204	61527396	Loss	9	Rtr5-03_GS-SMASH:61203204-61527396;Rtr21_S-SMASH:61203204-61527396;Rwt-1-SMASH:61203204-61477972;Rwt-2-SMASH:61203204-61477972;Rtr12_GS-SMASH:61203204-61527396;Rtr12_S-SMASH:61203204-61527396;Rtr5_GS-SMASH:61203204-61477972;Rtr3_GS-SMASH:61203204-61527396;Rtr7_S-SMASH:61203204-61527396
chr20	3849968	4106189	Loss	14	Rtr5-03_GS-SMASH:3892231-4067805;Rtr21_S-SMASH:3892231-4067805;Rtr3-2-SNPARRAY:3849968-4089309;Rtr5-7-SNPARRAY:3849968-4089309;Rwt-1-SMASH:3892231-4067805;Rtr3-1-SNPARRAY:3849968-4089309;Rwt-1-SNPARRAY:3849968-4089309;Rwt-2-SMASH:3892231-4067805;Rtr12_GS-SMASH:3892231-4067805;Rtr12_S-SMASH:3892231-4067805;Rtr5-3-SNPARRAY:3849968-4089309;Rtr3_GS-SMASH:3892231-4067805;Rtr7_S-SMASH:3892231-4067805;R…
chr1	48100199	48293879	Loss	1	Rtr21_S-SMASH:48100199-48293879
chr10	46980400	47136324	Loss	3	Rtr21_S-SMASH:46980400-47136324;Rtr12_GS-SMASH:46980400-47136324;Rtr5_GS-SMASH:47004945-47136324
chr12	5058406	5206061	Loss	1	Rtr21_S-SMASH:5058406-5206061
chr17	44168879	44348828	Gain	2	Rtr21_S-SMASH:44168879-44348828;Rwt-2-SMASH:44168879-44348828
chr17	69015782	69330539	Loss	1	Rtr21_S-SMASH:69015782-69330539
chr21	19194651	25342472	Loss	3	Rtr21_S-SMASH:19194651-25342472;Rtr21-3-SNPARRAY:19216823-25135625;Rtr21-2-SNPARRAY:19257946-25159426
chr3	111484917	111779848	Gain	10	Hwt-2-SNPARRAY:111484917-111747521;Htr8-2-SNPARRAY:111498020-111763506;Htr5-15-SMASH:111570530-111777765;Htr8-7-SNPARRAY:111595648-111773326;Htr8-4-SNPARRAY:111588951-111763267;Htr8-8-SNPARRAY:111595648-111773326;Htr8-6-SNPARRAY:111595648-111771620;Htr8-14-SNPARRAY:111590948-111779848;Htr8-5-SNPARRAY:111590948-111771620;Htr5-16-SMASH:111626971-111777765
chr4	169656986	169887860	Loss	1	Hwt-2-SNPARRAY:169656986-169887860
chr6	5001506	5260984	Loss	1	Hwt-2-SNPARRAY:5001506-5260984
chr15	67287929	67535713	Gain	13	Hwt-2-SNPARRAY:67308171-67535713;Htr8-1-SNPARRAY:67287929-67479197;Hte5-1-SNPARRAY:67305276-67485979;Htr8-2-SNPARRAY:67315949-67479153;Htr8-7-SNPARRAY:67300168-67458826;Htr8-4-SNPARRAY:67328511-67466494;Htr8-6-SNPARRAY:67300168-67458826;Htr8-3-SNPARRAY:67306956-67460950;Htr5-15-SMASH:67314233-67469977;Hte5-18-SMASH:67314233-67469977;Htr8-5-SNPARRAY:67300168-67458826;Htr5-16-SMASH:67314233-6746997…
chr16	6943552	7141365	Loss	6	Hwt-2-SNPARRAY:6943552-7141365;Htr8-1-SNPARRAY:6943552-7141365;Hte5-1-SNPARRAY:6943552-7130608;Htr8-4-SNPARRAY:6943552-7141365;Htr8-2-SNPARRAY:6943552-7141365;Htr8-3-SNPARRAY:6943552-7130608
chr16	78261488	78485192	Loss	13	Hwt-2-SNPARRAY:78265024-78476888;Htr8-15-SNPARRAY:78263809-78477826;Htr8-7-SNPARRAY:78261804-78477064;Htr8-1-SNPARRAY:78265431-78470103;Hte5-1-SNPARRAY:78261488-78475607;Htr8-4-SNPARRAY:78265235-78477127;Htr8-13-SNPARRAY:78263809-78485192;Htr8-8-SNPARRAY:78261804-78477064;Htr8-6-SNPARRAY:78261804-78477064;Htr8-2-SNPARRAY:78263355-78477120;Htr8-3-SNPARRAY:78268159-78477602;Htr8-11-SNPARRAY:7826380…
chr16	78575043	78801905	Loss	13	Hwt-2-SNPARRAY:78580577-78789123;Htr8-15-SNPARRAY:78577507-78728123;Htr8-7-SNPARRAY:78581172-78743948;Htr8-1-SNPARRAY:78578158-78784052;Hte5-1-SNPARRAY:78575043-78793915;Htr8-4-SNPARRAY:78576554-78801905;Htr8-13-SNPARRAY:78577507-78728123;Htr8-8-SNPARRAY:78581172-78743948;Htr8-6-SNPARRAY:78582911-78743948;Htr8-2-SNPARRAY:78578126-78752125;Htr8-3-SNPARRAY:78583481-78754070;Htr8-11-SNPARRAY:7857750…
chr4	1679977	1858444	Gain	2	Htr8-15-SNPARRAY:1691319-1858444;Htr8-16-SNPARRAY:1679977-1858444
chr6	20216884	20725113	Gain	12	Htr8-15-SNPARRAY:20364397-20656533;Htr8-7-SNPARRAY:20388928-20627801;Htr8-16-SNPARRAY:20364397-20625950;Htr8-8-SNPARRAY:20396105-20625950;Htr8-6-SNPARRAY:20388928-20624122;Htr5-15-SMASH:20386321-20614976;Htr8-27-SNPARRAY:20364397-20703099;Htr8-5-SNPARRAY:20378320-20625950;Htr5-16-SMASH:20386321-20614976;Htr18-01-SMASH:20301822-20720986;Htr5-12-SMASH:20301822-20720986;Htr5-17-SMASH:20216884-207251…
chr14	67626031	68415742	Loss	7	Htr8-15-SNPARRAY:67636236-68402340;Htr8-1-SNPARRAY:67643075-68402340;Htr8-8-SNPARRAY:67643293-68415742;Htr8-11-SNPARRAY:67636236-68402340;Htr5-15-SMASH:67626031-68414413;Htr3-14-SNPARRAY:67643075-68402340;Htr8-11-SNPARRAY:67636236-68402340;Htr5-13-SMASH:67685619-68414413
chr1	44249557	44534170	Gain	1	Htr8-7-SNPARRAY:44249557-44534170
chr1	192736868	193281059	Gain	12	Htr8-7-SNPARRAY:192926375-193219576;Htr18-02-SMASH:192873832-193281059;Htr13-02-SMASH:192873832-193281059;Htr18-01-SMASH:192873832-193281059;Htr8-8-SNPARRAY:192926375-193223344;Htr5-12-SMASH:192873832-193281059;Htr8-6-SNPARRAY:192926375-193219576;Htr5-15-SMASH:192910995-193238005;Htr5-13-SMASH:192965341-193182965;Htr8-5-SNPARRAY:192926375-193221031;Htr5-16-SMASH:192910995-193238005;Htr5-11-SMASH:…
chr2	32095518	32470535	Gain	8	Htr8-7-SNPARRAY:32111092-32390438;Htr8-8-SNPARRAY:32111092-32440696;Htr8-6-SNPARRAY:32111092-32449804;Htr5-15-SMASH:32095518-32470535;Htr5-13-SMASH:32152687-32410084;Htr5-18-SMASH:32152687-32410084;Htr8-5-SNPARRAY:32120626-32410883;Htr5-16-SMASH:32152687-32410084
chr2	138934183	139671192	Gain	12	Htr8-7-SNPARRAY:139173979-139515973;Htr8-8-SNPARRAY:139181725-139524141;Htr5-12-SMASH:139075273-139476533;Htr8-6-SNPARRAY:139181725-139524141;Htr5-17-SMASH:139188177-139510807;Htr5-15-SMASH:139133196-139510807;Htr5-13-SMASH:139133196-139510807;Htr8-5-SNPARRAY:139173979-139524141;Htr5-16-SMASH:139133196-139510807;Htr18-01-SMASH:139075273-139608474;Htr5-11-SMASH:138934183-139608474;Htr5-18-SMASH:13…
chr3	60221716	60412489	Loss	6	Htr8-7-SNPARRAY:60221716-60389794;Htr8-8-SNPARRAY:60221716-60412489;Htr8-6-SNPARRAY:60221716-60389794;Htr5-13-SMASH:60246178-60398070;Htr8-5-SNPARRAY:60221716-60412489;Htr5-16-SMASH:60246178-60398070
chr4	101958931	102216974	Gain	6	Htr8-7-SNPARRAY:101962673-102182200;Htr8-8-SNPARRAY:101962673-102182200;Htr8-6-SNPARRAY:101962673-102182200;Htr5-15-SMASH:101958931-102216974;Htr8-5-SNPARRAY:101962673-102182200;Htr5-16-SMASH:101958931-102216974
chr4	167294015	167414859	Gain	4	Htr8-7-SNPARRAY:167303023-167414859;Htr8-8-SNPARRAY:167309942-167414859;Htr8-6-SNPARRAY:167294015-167414859;Htr8-5-SNPARRAY:167309942-167414859
chr5	104717630	105012163	Gain	6	Htr8-7-SNPARRAY:104717630-104990970;Htr8-8-SNPARRAY:104717630-104994205;Htr8-6-SNPARRAY:104755522-104994205;Htr5-15-SMASH:104750546-104978079;Htr8-5-SNPARRAY:104755522-105012163;Htr5-16-SMASH:104750546-104978079
chr6	159107303	159358351	Gain	5	Htr8-7-SNPARRAY:159107303-159342251;Htr8-6-SNPARRAY:159107303-159358351;Htr5-15-SMASH:159120393-159358109;Htr8-5-SNPARRAY:159107303-159358351;Htr5-16-SMASH:159120393-159358109
chr7	126953396	127365743	Gain	9	Htr8-7-SNPARRAY:127043854-127348529;Htr18-02-SMASH:126953396-127365743;Htr18-01-SMASH:126953396-127365743;Htr8-8-SNPARRAY:127054405-127348529;Htr8-6-SNPARRAY:127043854-127348529;Htr5-11-SMASH:126953396-127365743;Htr5-15-SMASH:127076730-127354719;Htr8-5-SNPARRAY:127043854-127348529;Htr5-16-SMASH:127018642-127354719
chr8	1	12060604	Gain	1	Htr8-7-SNPARRAY:1-12060604
chr8	64766100	71650441	Loss	1	Htr8-7-SNPARRAY:64766100-71650441
chr8	116689545	146364022	Loss	1	Htr8-7-SNPARRAY:116689545-146364022
chr11	10343124	10512995	Gain	6	Htr8-7-SNPARRAY:10361897-10488544;Htr8-8-SNPARRAY:10354463-10488544;Htr8-6-SNPARRAY:10361897-10488544;Htr5-15-SMASH:10343124-10512995;Htr8-5-SNPARRAY:10361897-10488544;Htr5-16-SMASH:10343124-10512995
chr17	34440259	34645973	Gain	4	Htr8-7-SNPARRAY:34440259-34645973;Htr8-8-SNPARRAY:34440259-34645973;Htr8-6-SNPARRAY:34440259-34645973;Htr8-5-SNPARRAY:34440259-34645973
chr20	14938311	15047670	Loss	4	Htr8-7-SNPARRAY:14944725-15047670;Htr8-8-SNPARRAY:14938311-15047670;Htr8-6-SNPARRAY:14944725-15047670;Htr8-5-SNPARRAY:14944725-15047670
chr8	1	22876657	Loss	1	Htr8-1-SNPARRAY:1-22876657
chr2	140959142	141709024	Gain	1	Htr8-19-SNPARRAY:140959142-141709024
chr7	31836612	52027844	Gain	1	Htr5-14-SNPARRAY:31876068-52027844;Htr5-14-SMASH:31836612-51910577
chr1	192983063	193502209	Loss	1	Hte5-1-SNPARRAY:192983063-193502209
chr3	111413332	112320996	Gain	1	Hte5-1-SNPARRAY:111413332-112320996
chr3	175013413	175364317	Loss	1	Hte5-1-SNPARRAY:175013413-175364317
chr3	187956761	188189772	Loss	1	Hte5-1-SNPARRAY:187956761-188189772
chr4	79372261	79601843	Gain	1	Hte5-1-SNPARRAY:79372261-79601843
chr5	0	1241694	Gain	1	Hte5-1-SNPARRAY:0-1241694
chr5	1241695	7535101	Loss	1	Hte5-1-SNPARRAY:1241695-7535101
chr5	7535252	14619267	Gain	1	Hte5-1-SNPARRAY:7535252-14619267
chr5	14619843	14815619	Loss	1	Hte5-1-SNPARRAY:14619843-14815619
chr5	14815873	27183235	Gain	1	Hte5-1-SNPARRAY:14815873-27183235
chr5	27183236	32387298	Loss	1	Hte5-1-SNPARRAY:27183236-32387298
chr5	32387299	46233170	Gain	1	Hte5-1-SNPARRAY:32387299-46233170
chr5	49646456	55284830	Gain	1	Hte5-1-SNPARRAY:49646456-55284830
chr5	55284831	56046900	Loss	1	Hte5-1-SNPARRAY:55284831-56046900
chr5	56046901	60212685	Gain	1	Hte5-1-SNPARRAY:56046901-60212685
chr5	60212750	73891689	Loss	1	Hte5-1-SNPARRAY:60212750-73891689
chr5	73891980	93360824	Gain	1	Hte5-1-SNPARRAY:73891980-93360824
chr5	93360826	102652951	Loss	1	Hte5-1-SNPARRAY:93360826-102652951
chr5	102767505	114632158	Gain	1	Hte5-1-SNPARRAY:102767505-114632158
chr5	114632159	115123333	Loss	1	Hte5-1-SNPARRAY:114632159-115123333
chr5	115123659	134192694	Gain	1	Hte5-1-SNPARRAY:115123659-134192694
chr5	134192695	139421205	Loss	1	Hte5-1-SNPARRAY:134192695-139421205
chr5	139421589	149896059	Gain	1	Hte5-1-SNPARRAY:139421589-149896059
chr5	149896060	159594597	Loss	1	Hte5-1-SNPARRAY:149896060-159594597
chr5	159594598	171429333	Gain	1	Hte5-1-SNPARRAY:159594598-171429333
chr5	171429334	172064649	Loss	1	Hte5-1-SNPARRAY:171429334-172064649
chr5	172064659	175092845	Gain	1	Hte5-1-SNPARRAY:172064659-175092845
chr5	175092846	175659799	Loss	1	Hte5-1-SNPARRAY:175092846-175659799
chr5	175659892	176872016	Gain	1	Hte5-1-SNPARRAY:175659892-176872016
chr5	176872017	178162354	Loss	1	Hte5-1-SNPARRAY:176872017-178162354
chr5	178162446	180915260	Gain	1	Hte5-1-SNPARRAY:178162446-180915260
chr11	100140276	100559830	Gain	1	Hte5-1-SNPARRAY:100140276-100559830
chr16	12222144	12351695	Loss	1	Hte5-1-SNPARRAY:12222144-12351695
chr17	43878439	50443153	Gain	1	Hte5-1-SNPARRAY:43878439-50443153
chr20	30321887	30534168	Gain	1	Hte5-1-SNPARRAY:30321887-30534168
chr15	94173560	94529698	Loss	4	Rtr5-7-SNPARRAY:94173560-94526451;Rtr3-1-SNPARRAY:94173560-94526451;Rtr5_GS-SMASH:94202783-94529698;Rtr3_GS-SMASH:94202783-94529698
chr15	94526451	102531392	Gain	4	Rtr5-7-SNPARRAY:94526451-102531392;Rtr3-1-SNPARRAY:94526451-102531392;Rtr5_GS-SMASH:94529698-102364080;Rtr3_GS-SMASH:94529698-102364080
chr12	72852998	76119585	Gain	1	Htr8-4-SNPARRAY:72852998-76119585
chr2	160839529	161165848	Gain	5	Rwt-1-SMASH:160892424-161165848;Rtr12_GS-SMASH:160839529-161165848;Rtr12_S-SMASH:160892424-161115886;Rtr5_GS-SMASH:160839529-161165848;Rtr7_S-SMASH:160892424-161165848
chr8	42391525	47030407	Gain	1	Rwt-1-SMASH:42391525-47030407
chr12	0	38673796	Gain	1	Rwt-1-SMASH:0-38673796;Rwt-1-SNPARRAY:0-34895995
chr3	98161591	98335062	Gain	1	Htr5-11-SNPARRAY:98161591-98335062
chr4	165171399	165438234	Gain	1	Rtr21-3-SNPARRAY:165171399-165438234
chr4	64799955	65083193	Loss	1	Htr5-14-SMASH:64799955-65083193
chr4	72451187	72683663	Loss	1	Htr5-14-SMASH:72451187-72683663
chr5	82660	180915260	Gain	1	Htr5-14-SMASH:82660-180915260
chr18	54466579	54989432	Gain	1	Htr5-14-SMASH:54466579-54989432
chr19	20263983	20963623	Loss	1	Htr5-14-SMASH:20263983-20963623
chr9	139548449	140368570	Gain	1	Htr8-16-SNPARRAY:139548449-140368570
chr11	107295856	108126493	Gain	1	Htr8-16-SNPARRAY:107295856-108126493
chr5	63498708	105185661	Gain	1	Htr5-16-SNPARRAY:63498708-105185661
chr5	105389509	180915260	Loss	1	Htr5-16-SNPARRAY:105389509-180915260
chr13	90007500	115169878	Gain	1	Htr8-26-SNPARRAY:90007500-115169878
chr18	33261156	34065455	Gain	3	Htr8-26-SNPARRAY:33302879-34065455;Htr18-01-SMASH:33261156-33975356;Htr8-27-SNPARRAY:33302879-34065455
chr4	59024529	60441577	Gain	2	Rwt-2-SMASH:59024529-60441577;Rtr7_S-SMASH:59024529-60327039
chr4	179701164	179922461	Loss	1	Rwt-2-SMASH:179701164-179922461
chr11	96166696	96658497	Loss	1	Rwt-2-SMASH:96166696-96658497
chr6	4918351	5445867	Loss	4	Htr18-02-SMASH:4918351-5445867;Htr13-02-SMASH:4918351-5316332;Htr13-03-SMASH:4918351-5316332;Htr21-03-SMASH:4918351-5316332
chr17	28475579	29516064	Gain	1	Htr18-02-SMASH:28475579-29516064
chr18	500948	37348508	Gain	1	Htr18-02-SMASH:500948-9146871;Htr18-02-SMASH:9724957-37348508
chr18	55007634	60961577	Loss	1	Htr18-02-SMASH:55007634-60961577
chr18	63121829	65136533	Gain	2	Htr18-02-SMASH:63121829-65136533;Htr18-01-SMASH:63121829-65136533
chr17	44168879	44913925	Gain	1	Rtr12_GS-SMASH:44168879-44913925
chr19	7551016	7734180	Loss	1	Rtr12_GS-SMASH:7551016-7734180
chr20	10007848	10313568	Loss	1	Rtr12_GS-SMASH:10007848-10313568
chr1	174974908	175501515	Loss	1	Htr13-02-SMASH:174974908-175501515
chr13	19638329	21897699	Gain	1	Htr13-02-SMASH:19638329-21897699
chr1	35151642	35563808	Gain	1	Htr18-01-SMASH:35151642-35563808
chr1	226060215	226515863	Gain	1	Htr18-01-SMASH:226060215-226515863
chr2	185481649	185887714	Gain	1	Htr18-01-SMASH:185481649-185887714
chr4	101603703	102009987	Gain	1	Htr18-01-SMASH:101603703-102009987
chr4	169661292	170072312	Loss	1	Htr18-01-SMASH:169661292-170072312
chr18	74637647	75320265	Gain	1	Htr18-01-SMASH:74637647-75320265
chr2	240058704	240429624	Loss	1	Htr13-03-SMASH:240058704-240429624
chr8	0	489818	Gain	1	Htr13-03-SMASH:0-489818
chr13	19638329	20582481	Gain	1	Htr13-03-SMASH:19638329-20582481
chr13	20582481	22842896	Loss	1	Htr13-03-SMASH:20582481-22842896
chr13	24416810	30827167	Loss	1	Htr13-03-SMASH:24416810-30827167
chr13	36097890	46218979	Loss	1	Htr13-03-SMASH:36097890-46218979
chr13	52583833	53238771	Gain	1	Htr13-03-SMASH:52583833-53238771
chr13	62963465	67803362	Loss	1	Htr13-03-SMASH:62963465-67803362
chr13	92070738	93741845	Loss	1	Htr13-03-SMASH:92070738-93741845
chr13	98759788	106631707	Loss	1	Htr13-03-SMASH:98759788-106631707
chr13	108311427	112826362	Loss	1	Htr13-03-SMASH:108311427-112826362
chr7	26385532	28316993	Gain	1	Htr8-8-SNPARRAY:26385532-28316993
chr11	28058199	28370979	Loss	3	Htr8-8-SNPARRAY:28084701-28370979;Htr5-15-SMASH:28111774-28340186;Htr5-13-SMASH:28058199-28284165
chr14	22498804	22965722	Gain	3	Htr8-8-SNPARRAY:22498804-22951871;Htr8-6-SNPARRAY:22507972-22965722;Htr8-5-SNPARRAY:22507972-22947067
chr18	54671609	54944260	Gain	5	Htr8-8-SNPARRAY:54689217-54944260;Htr8-6-SNPARRAY:54689217-54931133;Htr5-15-SMASH:54671609-54936843;Htr8-5-SNPARRAY:54689885-54931133;Htr5-16-SMASH:54671609-54936843
chr11	88596070	89549573	Gain	1	Rtr12_S-SMASH:88596070-89549573
chr12	0	133851895	Loss	1	Rtr12_S-SMASH:0-133851895
chr16	50847718	50998968	Loss	1	Rtr12_S-SMASH:50847718-50998968
chr16	55419284	55623914	Loss	1	Rtr12_S-SMASH:55419284-55623914
chr21	15463486	19194651	Gain	1	Rtr12_S-SMASH:15463486-19194651
chr21	25398604	48129895	Gain	1	Rtr12_S-SMASH:25398604-48129895
chr1	11159309	11661893	Loss	1	Rtr5_GS-SMASH:11159309-11661893
chr7	132916460	133288576	Loss	2	Rtr5_GS-SMASH:132916460-133288576;Rtr3_GS-SMASH:132916460-133183343
chr2	32119007	32738102	Gain	1	Htr5-12-SMASH:32119007-32738102
chr3	188818757	189477422	Gain	1	Htr5-12-SMASH:188818757-189477422
chr5	151864185	153244266	Loss	1	Htr5-12-SMASH:151864185-153244266
chr12	274722	563138	Gain	1	Htr5-12-SMASH:274722-563138
chr4	164977109	165851532	Gain	1	Rtr5-3-SNPARRAY:164977109-165851532
chr2	131889672	133108340	Gain	3	Rtr3_GS-SMASH:131889672-133108340;Rtr7_S-SMASH:131889672-133108340;Htr5-16-SMASH:131984523-133064634
chr3	107394216	107853410	Loss	1	Rtr3_GS-SMASH:107394216-107853410
chr3	133507416	133821374	Loss	1	Rtr3_GS-SMASH:133507416-133821374
chr3	176679121	197794312	Gain	1	Rtr3_GS-SMASH:176679121-197794312
chr7	69268856	69418894	Loss	1	Rtr3_GS-SMASH:69268856-69418894
chr7	76144988	76846764	Gain	1	Rtr3_GS-SMASH:76144988-76846764
chr10	19899434	20065934	Loss	1	Rtr3_GS-SMASH:19899434-20065934
chr15	22972539	23807269	Gain	1	Rtr3_GS-SMASH:22972539-23807269
chr16	69609563	71386320	Gain	1	Rtr3_GS-SMASH:69609563-71386320
chr17	62543869	62986619	Gain	1	Rtr3_GS-SMASH:62543869-62986619
chr17	67687788	67848275	Loss	1	Rtr3_GS-SMASH:67687788-67848275
chr19	43136501	43797867	Gain	2	Rtr3_GS-SMASH:43136501-43663093;Htr5-16-SMASH:43197994-43797867
chr1	174030426	174413594	Gain	1	Htr8-6-SNPARRAY:174030426-174413594
chr20	48237658	48431830	Gain	4	Htr8-6-SNPARRAY:48237658-48377980;Htr8-5-SNPARRAY:48237658-48379462;Htr5-15-SMASH:48253619-48431830;Htr5-16-SMASH:48253619-48431830
chr1	173763970	174515729	Gain	1	Htr5-11-SMASH:173763970-174515729
chr2	7722608	8103320	Loss	1	Htr5-11-SMASH:7722608-8103320
chr2	31805487	32598328	Gain	1	Htr5-11-SMASH:31805487-32598328
chr12	74872876	76105865	Gain	1	Htr5-11-SMASH:74872876-76105865
chr7	65617783	66412745	Gain	1	Htr8-2-SNPARRAY:65617783-66412745
chr8	1	41499358	Loss	1	Htr8-2-SNPARRAY:1-41499358
chr8	62256246	109010274	Loss	1	Htr8-2-SNPARRAY:62256246-109010274
chr8	128388046	146364022	Loss	1	Htr8-2-SNPARRAY:128388046-146364022
chr11	84050724	84215578	Loss	4	Htr8-2-SNPARRAY:84050724-84188403;Htr5-15-SMASH:84061401-84215578;Htr5-13-SMASH:84061401-84215578;Htr5-16-SMASH:84061401-84215578
chr15	96729045	98703818	Gain	1	Htr8-2-SNPARRAY:96729045-98703818
chr15	98703818	99076205	Loss	1	Htr8-2-SNPARRAY:98703818-99076205
chr6	130449909	130775655	Loss	1	Htr8-3-SNPARRAY:130449909-130775655
chr3	187872245	188233974	Gain	1	Htr5-15-SMASH:187872245-188233974
chr5	36442302	37038752	Gain	1	Htr5-15-SMASH:36442302-37038752
chr6	73010439	74007583	Gain	2	Htr5-15-SMASH:73010439-74007583;Htr5-13-SMASH:73010439-74007583
chr6	166814245	166967467	Loss	1	Htr5-15-SMASH:166814245-166967467
chr6	169792277	170064150	Loss	2	Htr5-15-SMASH:169792277-170064150;Htr5-13-SMASH:169844104-170064150
chr6	170064150	171115067	Gain	2	Htr5-15-SMASH:170064150-171115067;Htr5-13-SMASH:170064150-171115067
chr7	133758204	133923478	Loss	1	Htr5-15-SMASH:133758204-133923478
chr8	39203585	39546859	Gain	1	Htr5-15-SMASH:39203585-39546859
chr16	14916352	15494082	Gain	1	Htr5-15-SMASH:14916352-15494082
chr20	14888550	15045132	Loss	1	Htr5-15-SMASH:14888550-15045132
chr9	139921116	140368570	Gain	1	Htr8-27-SNPARRAY:139921116-140368570
chr3	187239268	188136440	Gain	1	Htr5-19-SNPARRAY:187239268-188136440
chr5	48719715	180915260	Loss	1	Htr5-19-SNPARRAY:48719715-180915260
chr7	472621	810598	Gain	1	Rtr7_S-SMASH:472621-810598
chr7	117755053	122595427	Gain	1	Rtr7_S-SMASH:117755053-122595427
chr7	133602204	147451883	Loss	1	Rtr7_S-SMASH:133602204-147451883
chr9	71093632	141213431	Gain	1	Rtr7_S-SMASH:71093632-141213431
chr10	46572512	47136324	Loss	1	Rtr7_S-SMASH:46572512-47136324
chr17	10605560	10764795	Loss	1	Rtr7_S-SMASH:10605560-10764795
chr13	35446016	36073720	Gain	1	Rtr21-2-SNPARRAY:35446016-36073720
chr5	12308749	12700699	Loss	1	Htr5-13-SMASH:12308749-12700699
chr18	149800	261075	Loss	1	Htr5-13-SMASH:149800-261075
chr18	75829352	75978250	Loss	1	Htr5-13-SMASH:75829352-75978250
chr22	48238148	48393062	Loss	1	Htr5-13-SMASH:48238148-48393062
chr2	219540202	219717342	Loss	1	Htr5-18-SMASH:219540202-219717342
chr5	82660	26299142	Gain	1	Htr5-18-SMASH:82660-26299142
chr6	1577984	2246284	Loss	1	Htr5-18-SMASH:1577984-2246284
chr7	127018642	127551543	Gain	1	Htr5-18-SMASH:127018642-127551543
chr8	89962337	139519958	Gain	1	Htr8-5-SNPARRAY:89962337-139519958
chr3	75388678	76025798	Gain	1	Htr5-16-SMASH:75388678-76025798
chr3	162471246	162746760	Gain	1	Htr5-16-SMASH:162471246-162746760
chr4	167284048	167519875	Gain	1	Htr5-16-SMASH:167284048-167519875
chr5	32015941	32188526	Gain	1	Htr5-16-SMASH:32015941-32188526
chr5	34045023	34453371	Gain	1	Htr5-16-SMASH:34045023-34453371
chr7	110245731	110415701	Gain	1	Htr5-16-SMASH:110245731-110415701
chr7	111226297	111395559	Gain	1	Htr5-16-SMASH:111226297-111395559
chr8	39203585	39431830	Gain	1	Htr5-16-SMASH:39203585-39431830
chr10	15158251	15332313	Gain	1	Htr5-16-SMASH:15158251-15332313
chr17	36190828	36496349	Gain	1	Htr5-16-SMASH:36190828-36496349
chr20	14939857	15096740	Loss	1	Htr5-16-SMASH:14939857-15096740
chr3	0	1574032	Gain	1	Htr21-03-SMASH:0-1574032
chr3	11235021	11957835	Loss	1	Htr21-03-SMASH:11235021-11957835
chr7	62461906	67088832	Gain	1	Htr21-03-SMASH:62461906-67088832
chr21	18602294	19497291	Gain	1	Htr21-03-SMASH:18602294-19497291
chr21	27586838	28926863	Gain	1	Htr21-03-SMASH:27586838-28926863
chr21	32132904	33941436	Gain	1	Htr21-03-SMASH:32132904-33941436
chr21	34616333	37402190	Gain	1	Htr21-03-SMASH:34616333-37402190
chr21	39353007	40933053	Gain	1	Htr21-03-SMASH:39353007-40933053
chr21	44942822	46062104	Loss	1	Htr21-03-SMASH:44942822-46062104
chr3	122708761	198022430	Loss	1	Htr3-13-SNPARRAY:122708761-198022430
chr7	0	53059564	Loss	1	Htr3-13-SNPARRAY:0-39823396;Htr3-13-SNPARRAY:40367959-53059564
chr7	53059564	54704182	Gain	1	Htr3-13-SNPARRAY:53059564-54704182
Kneissig et al
