# Supplementary material for: Micronuclei-based model system reveals functional consequences of chromothripsis in human cells
Source: eLife. 2019 Nov 28;8:e50292. doi: 10.7554/eLife.50292 (PMC6910827; doi:10.7554/eLife.50292)
Supplement: Supplementary file 4. [file elife-50292-supp4.xlsx]

## Sheet: Sheet1
Supplementary File 4 | Breakpoint junctions detected by WGS that were selected for validation by PCR, Sanger sequencing and de novo assembly.
(a) Unique ID per identified breakpoint junction. In four cases, one rearrangement detected by WGS was found to consist of multiple rearrangements by validations via PCR and Sanger sequencing or de novo assembly. These are indicated by a/b/c.
(b) For every breakpoint junction our analysis pipeline specifies the coordinates (hg19) of the boundaries of the two genomic fragments that are connected together. Coordinates represent the outer boundaries derived from all whole genome sequencing reads supporting the breakpoint junction. Chr1, s1 and e1 specify the chromosome and left and right coordinate of the first fragment respectively. Sim…
(c) Orientation of the breakpoint (BP) junction between the two chromosomal fragments specified in each row. A fragment can be detected at its head (H) or tail (T) side to another fragment. The first letter (H or T) indicates the orientation of fusion of the first fragment (chr1, s1, e1) and the second letter indicates the fusion orientation of the second fragment (chr2, s2, e2).
(d) Total number of unique whole genome sequencing reads supporting the breakpoint junction. All reads were uniquely identified in the indicated cell line by WGS and not in any of a total of 247 control whole genome and mate-pair sequencing datasets.
(e) For every breakpoint junction, chr1, bp1 and str1 indicate the exact breakpoint location of the first, and chr2, bp2 and str2 that of the second of the two fragments that are connected together at the specific breakpoint junction.
(f) Breakpoint ID(s) of the breakpoint(s) identified by WGS that were validated. For rearrangements detected by WGS that consisted of multiple rearrangements (indicated by a/b/c in column a), different WGS breakpoint calls were found to overlap the same validated breakpoint.
(g) Cell lines the breakpoint junction was confirmed in by PCR and Sanger sequencing.
(h) Characteristics of the breakpoint junction. Chromosomal fragments can be either fused blunt, the connection can be guided by (micro)homologous sequences at either end of the junction or a few (non-templated) nucleotides can be inserted between the two connected ends. Bp change represents microhomology or inserted sequence found at the breakpoint junction.
(i) For all unique CNA breakpoints on the aneuploid chromosome detected by SNP array, we searched for the nearest validated supporting WGS breakpoint. CNA breakpoints and WGS breakpoint are reported as supporting if the breakpoins are within a maximum of 1 Mb distance.
(j) CNA ID corresponds to the ID listed in Supplementary Table 5
(k) Distance range of CNA breakpoint defined by SNP array to the WGS breakpoint
		Whole genome sequencing results								PCR and Sanger sequencing validations												Support for uniquede novoCNA breakpoints on the aneuploid chromosome as detected by SNP array
Unique ID (a)	Cell line	chr1 (b)	s1 (b)	e1 (b)	chr2 (b)	s2 (b)	e2 (b)	Junction orientation (c)	Total counts (d)	PCR results	De novo	chr1 (e)	bp1 (e)	str1 (e)	chr2 (e)	bp2 (e)	str2 (e)	Validated WGS unique ID (f)	Breakpoint presence (g)	Breakpoint signature (h)	Bp change (h)	CNA breakpoint supported by s1/bp1 (i)	CNA ID (j)	Distance (k)	CNA breakpoint supported by s1/bp1 (i)	CNA ID (j)	Distance (k)
001	Hte5-01	1	143498448	143498637	2	68251174	68251666	TT	24	Validated	Yes	1	143498620	+	2	68251666	-	001	Hte5-01	Ambiguous mapping	Unknown	-	-	-	-	-	-
002	Hte5-01	1	17018816	17019156	8	33633534	33633962	HT	26	Validated	Yes	1	17018816	-	8	33633962	-	002	Hte5-01	(Micro)homology	T	-	-	-	-	-	-
003	Hte5-01	2	243153512	243153709	5	139770759	139771130	TT	23	Validated	Yes	2	243153709	+	-	-	-	003	Hte5-01	One flank	Unknown	-	-	-	No	-	-
004	Hte5-01	3	111440869	111441186	3	112345814	112346217	HT	23	Validated	Yes	3	111440870	-	3	112346217	-	004	Hte5-01	Insertion	TTCCAA	-	-	-	-	-	-
005	Hte5-01	3	114322959	114323340	3	114537468	114537949	HT	23	Validated	Yes	3	114322961	-	3	114537949	-	005	Hte5-01	Insertion	TAC	-	-	-	-	-	-
006	Hte5-01	3	114504968	114505332	3	114553535	114553966	TT	25	Validated	Yes	-	-	-	3	114553966	-	006	Hte5-01	One flank	Unknown	-	-	-	-	-	-
007	Hte5-01	4	118095570	118096001	4	118110246	118110593	HT	26	Validated	Yes	4	118095570	-	4	118110593	-	007	Hte5-01	Insertion	AAACATCTTCTGTGTGAATAACTAGTCACCTGTTCAACAATCTAA	-	-	-	-	-	-
008	Hte5-01	4	143236299	143236634	4	143314513	143314946	HT	30	Validated	Yes	4	143236299	-	4	143314946	-	008	Hte5-01	(Micro)homology	A	-	-	-	-	-	-
009	Hte5-01	5	1469225	1469353	5	133972721	133973072	HT	26	Validated	Yes	5	1469225	-	5	133973071	-	009 / 035a	Hte5-01	Insertion	TAATATATATATATTTAATTACATATATATATG	Yes	c014-c015	227531	No	-	-
010	Hte5-01	5	1469225	1469353	5	175215507	175216089	TT	29	Validated	Yes	5	1469353	+	5	175216089	-	010 / 035b	Hte5-01	(Micro)homology	TG	No	-	-	Yes	c035-c036	443710
011	Hte5-01	5	6797469	6797850	5	140126273	140126600	HH	37	Validated	Yes	5	6797469	-	5	140126273	+	011	Hte5-01	Insertion	CAAAGGCAGGAGTATGTCAG	No	-	-	No	-	-
012	Hte5-01	5	7779425	7779819	5	14644528	14644901	HT	66	Validated	Yes	5	7779427	-	5	14644900	-	012	Hte5-01	Insertion	TGCAGGTTCCCAAATGCAGTTCCCAAATGCAGGTTTTC	Yes	c015-c016	244326	Yes	c016-c017	25633
013	Hte5-01	5	14152050	14152464	5	133602490	133602575	TH	15	Validated	Yes	5	14152464	+	5	133602490	+	013 / 014a / 015a	Hte5-01	(Micro)homology	TATTTCA	Yes	c017-c018	663155	No	-	-
014a	Hte5-01	5	14152099	14152464	5	134735288	134735427	TT	9	Validated	Yes	5	14152464	+	5	133602490	+	013 / 014a / 015a	Hte5-01	(Micro)homology	TATTTCA	Yes	c017-c018	663155	No	-	-
014b	Hte5-01	5	14152099	14152464	5	134735288	134735427	TT	9	Validated	Yes	5	133602575	+	5	134735427	-	014b / 015b / 034	Hte5-01	Blunt	None	No	-	-	No	-	-
015a	Hte5-01	5	14152314	14152464	5	39160324	39160695	TT	27	Validated	Yes	5	14152464	+	5	133602490	+	013 / 014a / 015a	Hte5-01	(Micro)homology	TATTTCA	Yes	c017-c018	663155	No	-	-
015b	Hte5-01	5	14152314	14152464	5	39160324	39160695	TT	27	Validated	Yes	5	133602575	+	5	134735427	-	014b / 015b / 034	Hte5-01	Blunt	None	No	-	-	No	-	-
015c	Hte5-01	5	14152314	14152464	5	39160324	39160695	TT	27	Validated	Yes	5	134735288	-	5	39160695	-	015c / 019	Hte5-01	(Micro)homology	CTGG	No	-	-	No	-	-
016	Hte5-01	5	16935950	16936214	5	134735149	134735337	HH	10	Validated	Yes	5	16935914	-	5	134735149	+	016	Hte5-01	Blunt	None	No	-	-	No	-	-
017	Hte5-01	5	32497208	32497437	5	175154468	175154890	HT	4	Validated	Yes	5	32497208	-	5	175154890	-	017	Hte5-01	Insertion	ATCCTAACACATGGCACACTTATATATATATATAATTATATATATATGTATATATATATATACACATGTAAGAT	Yes	c019-c020	109910	No	-	-
018	Hte5-01	5	34346137	34346548	5	34699164	34699540	HT	28	Validated	Yes	5	34346137	-	5	34699539	-	018	Hte5-01	(Micro)homology	A	No	-	-	No	-	-
019	Hte5-01	5	39160318	39160695	5	133602490	133602575	TT	22	Validated	Yes	5	39160695	+	5	134735288	+	015c / 019	Hte5-01	(Micro)homology	CCAG	No	-	-	No	-	-
020	Hte5-01	5	49439387	49439597	5	52694062	52694423	HT	14	Validated	Yes	5	49439387	-	5	52694441	-	020	Hte5-01	Blunt	None	No	-	-	No	-	-
021	Hte5-01	5	55213992	55214480	5	176826004	176826182	TH	27	Validated	Yes	5	55214480	+	5	176826004	+	021	Hte5-01	Insertion	ATTTATATATTTATTTCTCAGGTTAAACTTTGGCTCA	Yes	c020-c021	70350	Yes	c036-c037	46012
022	Hte5-01	5	56046639	56046991	5	115156453	115156874	HH	34	Validated	Yes	5	56046642	-	5	115156453	+	022	Hte5-01	Insertion	CTACAGATTTGTACAATAGTGACAAGTTTACATGTACATGTATTGTATAGGTAAGA	Yes	c021-c022	258	Yes	c027-c028	33120
023	Hte5-01	5	60168215	60168707	5	133972901	133973046	TH	36	Validated	Yes	5	60168706	+	5	133972901	+	023	Hte5-01	Blunt	None	Yes	c022-c023	43979	No	-	-
024	Hte5-01	5	64867312	64867722	5	65083319	65083742	TH	13	Validated	Yes	5	64867722	+	5	65083319	+	024	Hte5-01	(Micro)homology	GT	No	-	-	No	-	-
025	Hte5-01	5	73952665	73953041	5	133697604	133698021	HT	28	Validated	Yes	5	73952665	-	5	133698017	-	025	Hte5-01	Insertion	TTAATTATGCGAAATTTACACATTTACATATATTATATAATATTTATA	Yes	c023-c024	60976	No	-	-
026	Hte5-01	5	92965639	92966010	5	140133865	140134271	TH	33	Validated	Yes	5	92966010	+	5	140133866	+	026	Hte5-01	(Micro)homology	TT	No	-	-	No	-	-
027a	Hte5-01	5	93000188	93000353	5	133972901	133973046	HT	12	Validated	Yes	5	93000188	-	5	159443058	-	027a	Hte5-01	Insertion	AACAGTGAACCCCATCTCTACTAAAAACACAATATTATACATTTACTGATT	Yes	c024-c025	360636	No	-	-
027b	Hte5-01	5	93000188	93000353	5	133972901	133973046	HT	12	Validated	Yes	5	159442995	-	5	133973046	-	027b	Hte5-01	(Micro)homology	A	No	-	-	No	-	-
028	Hte5-01	5	102836084	102836543	5	159527816	159528149	HH	23	Validated	Yes	5	102836084	-	5	159527817	+	028	Hte5-01	Blunt	None	Yes	c025-c026	183133	Yes	c031-c032	66780
029	Hte5-01	5	103439920	103440490	5	104515449	104515776	TH	16	Validated	Yes	5	103440490	+	5	104515449	+	029	Hte5-01	Blunt	None	No	-	-	No	-	-
030	Hte5-01	5	114573598	114573899	5	123985291	123985737	TT	24	Validated	Yes	5	114573899	+	5	123985737	-	030	Hte5-01	Insertion	GATATCAAATTTATATTCTGATATAATCTATAATAAATAAATATT	Yes	c026-c027	58259	No	-	-
031	Hte5-01	5	115714105	115714535	5	115740999	115741478	TH	34	Validated	Yes	5	115714535	+	5	115740999	+	031	Hte5-01	(Micro)homology	G	No	-	-	No	-	-
032	Hte5-01	5	123986012	123986332	5	167599302	167599711	HT	24	Validated	Yes	5	123986015	-	5	167599711	-	032	Hte5-01	Insertion	AATATATATATAAATATAATAATAATATCG	No	-	-	No	-	-
033	Hte5-01	5	132142808	132143048	5	168370322	168370609	HH	13	Validated	Yes	5	132142810	-	5	168370322	+	033	Hte5-01	Insertion	AGATTATATAAATATATAAATATTTATTATTATTAATAATTTGAA	No	-	-	No	-	-
034	Hte5-01	5	133602490	133602575	5	134735288	134735427	TT	14	Validated	Yes	5	133602575	+	5	134735427	-	014b / 015b / 034	Hte5-01	Blunt	None	No	-	-	No	-	-
035a	Hte5-01	5	133972858	133973071	5	175215794	175216089	TT	13	Validated	Yes	5	133973071	+	5	1469225	+	009 / 035a	Hte5-01	Insertion	TAATATATATATATTTAATTACATATATATATG	No	-	-	Yes	c014-c015	227531
035b	Hte5-01	5	133972858	133973071	5	175215794	175216089	TT	13	Validated	Yes	5	1469353	+	5	175216089	-	010 / 035b	Hte5-01	(Micro)homology	TG	No	-	-	Yes	c035-c036	443710
036	Hte5-01	5	133988710	133989196	5	172061835	172062332	TH	39	Validated	Yes	5	133989196	+	5	172061835	+	036	Hte5-01	Insertion	G	Yes	c028-c029	203498	Yes	c033-c034	2814
037a	Hte5-01	5	139436960	139437324	5	149096787	149097123	HH	30	Validated	Yes	5	139436960	-	5	175165854	-	037a	Hte5-01	Insertion	AACAAAATATATATCATATT	Yes	c029-c030	15755	No	-	-
037b	Hte5-01	5	139436960	139437324	5	149096787	149097123	HH	30	Validated	Yes	5	175165787	-	5	149096787	+	037b	Hte5-01	Blunt	None	Yes	c034-c035	72942	Yes	c030-c031	799272
038	Hte5-01	5	139987505	139987922	5	140127204	140127656	HT	37	Validated	Yes	5	139987497	-	5	140127656	-	038	Hte5-01	(Micro)homology	TGCCTGTAATCCCAGC___TTGGGAGGC	No	-	-	No	-	-
039	Hte5-01	5	140835599	140836027	5	140912550	140913015	HT	22	Validated	Yes	5	140835599	-	5	140913019	-	039	Hte5-01	(Micro)homology	TCC	No	-	-	No	-	-
040	Hte5-01	5	163554383	163554808	5	164137288	164137714	HT	87	Validated	Yes	5	163554383	-	5	164137714	-	040	Hte5-01	Insertion	TAACATA	No	-	-	No	-	-
041	Hte5-01	5	163582868	163583376	5	166601443	166601895	HT	41	Validated	Yes	5	163582868	-	5	166601890	-	041	Hte5-01	Insertion	TCTT	No	-	-	No	-	-
042	Hte5-01	5	176414390	176414790	5	176533086	176533504	HT	26	Validated	Yes	5	176414365	-	5	176533580	-	042	Hte5-01	(Micro)homology	GGCTGGGCACAGTGACTCACACCTGTAATCCCAGCACTTTAGGAGGCTGAGGCTGGTGTATCACTCGAGGTGAGGAGTTTGAGACCAGCCTGGCCAACATGGTGAAACCCCATCTCTACCAAAAAATAAAA	No	-	-	No	-	-
043	Hte5-01	7	31454724	31455094	7	31482000	31482451	HT	23	Validated	Yes	-	-	-	7	31482451	-	043	Hte5-01	One flank	Unknown	-	-	-	-	-	-
044	Hte5-01	7	35730794	35731138	7	35916439	35916874	HT	22	Validated	Yes	7	35730794	-	-	-	-	044	Hte5-01	One flank	Unknown	-	-	-	-	-	-
045	Hte5-01	11	77082964	77083313	11	77171796	77172185	HT	27	Not validated	-	-	-	-	-	-	-	-	No PCR product	-	-	-	-	-	-	-	-
046	Hte5-01	12	66326653	66327092	8	33633984	33634268	TH	25	Validated	Yes	12	66327092	+	8	33633985	+	046	Hte5-01	Blunt	None	-	-	-	-	-	-
047	Hte5-01	20	30317751	30318095	20	30551370	30551774	HT	26	Not validated	-	-	-	-	-	-	-	-	No PCR product	-	-	-	-	-	-	-	-
048	Hte5-01	20	30457645	30458101	20	30533638	30534079	TT	28	Not validated	-	-	-	-	-	-	-	-	No PCR product	-	-	-	-	-	-	-	-
049	Htr8-01	3	132565137	132565458	3	132577167	132577562	TH	18	Validated	No	3	132565458	+	3	132577167	+	049	Htr8-1, Parental HCT116	Insertion	ATATATATAT	-	-	-	-	-	-
050	Htr8-01	8	22973781	22974044	8	144300168	144300324	HH	6	Validated	Yes	-	-	-	-	-	-	050	Htr8-01	-	-	Yes	c043 end	97124	No	-	-
051	Htr8-01	8	42207574	42207801	8	144300190	144300277	HH	3	Validated	Yes	8	42207574	-	8	144300246	+	051	Htr8-01	(Micro)homology	CCAC	No	-	-	No	-	-
052	Htr8-01	8	119727828	119728087	8	119743976	119744286	TH	11	Validated	Yes	8	119728087	+	8	119743976	+	052	Htr8-01	Insertion	CCACACTTCACAGC	No	-	-	No	-	-
053	Htr8-01	8	128210242	128210589	8	128383130	128383583	HT	24	Validated	Yes	8	128210242	-	8	128383583	-	053	Htr8-01	Insertion	GC	No	-	-	No	-	-
054	Htr8-01	8	139505090	139505195	8	140279188	140279510	TT	3	Validated	Yes	8	139505195	+	8	140279598	-	054	Htr8-01	(Micro)homology	TCA	No	-	-	No	-	-
055	Htr8-01	14	97704547	97704894	14	97718627	97718936	TH	14	Not validated	-	-	-	-	-	-	-	-	-	-	-	-	-	-	-	-	-
056	Htr8-02	8	7269244	7269332	8	42655829	42655979	TT	3	Validated	No	-	-	-	-	-	-	056	Htr8-02, parental HCT116, A9 donor cells + chr 8	-	-	No	-	-	No	-	-
057	Htr8-02	8	41603590	41603864	8	41606567	41606813	HH	8	Validated	Yes	8	41603590	-	8	41606506	+	057	Htr8-02	(Micro)homology	GA	Yes	c045 end	104232	No	-	-
058	Htr8-02	8	43074925	43075131	8	43782807	43783019	HT	3	Validated	Yes	8	43074925	-	8	43783060	-	058	Htr8-02	Insertion	CATGTG	No	-	-	No	-	-
059	Htr8-02	8	43750496	43750833	8	128468517	128469046	TT	17	Validated	Yes	8	43750833	+	-	-	-	059	Htr8-02	One flank	Unknown	No	-	-	Yes	c047 start	81000
060	Htr8-02	8	62187371	62187669	8	108513286	108513577	TH	7	Validated	Yes	8	62187669	+	8	108513286	+	060	Htr8-02	(Micro)homology	AAAA	Yes	c046 start	68577	No	-	-
061	Htr8-02	8	108574868	108575081	8	114265866	114266246	HT	5	Validated	Yes	8	108574855	-	8	114266275	-	061	Htr8-02	(Micro)homology	GGTCTAGATTG	Yes	c046 end	435419	No	-	-
062	Htr8-02	8	124230595	124230946	8	124800010	124800467	HT	19	Validated	Yes	8	124230595	-	8	124800467	-	062	Htr8-02	Blunt	None	No	-	-	No	-	-
063	Htr8-02	14	100702359	100702756	14	100871536	100872037	HT	18	Validated	Yes	14	100702359	-	14	100872037	-	063	Htr8-02	(Micro)homology	GC	-	-	-	-	-	-
064	Htr8-02	15	96716843	96717124	15	99107281	99107701	HT	20	Validated	Yes	15	96716843	-	15	99107701	-	064	Htr8-02	Insertion	TTAAAAGTCCTGTTAGGGGATGTTGGAATTGTTGATTCCTACCTATGCCA	-	-	-	-	-	-
065	Htr8-02	15	98708036	98708418	15	99072706	99073047	TH	44	Validated	Yes	15	98708417	+	15	99072706	+	065	Htr8-02	Blunt	None	-	-	-	-	-	-
066	Htr8-02	22	36716498	36716910	22	36737398	36737903	TH	25	Validated	Yes	22	36716910	+	22	36737399	+	066	Htr8-02	Blunt	None	-	-	-	-	-	-
067	Htr8-05	3	175333054	175333306	3	175394233	175394668	HT	12	Validated	Yes	3	175394668	-	3	175333054	-	067	Htr8-05	(Micro)homology	TT	-	-	-	-	-	-
068	Htr8-05	8	1167271	1167663	8	142502335	142503312	HH	18	Validated	Yes	8	1167271	-	8	142502426	+	068	Htr8-05	(Micro)homology	CAGG	No	-	-	No	-	-
069	Htr8-05	8	1192287	1192444	8	142521946	142522400	HT	21	Validated	Yes	8	1192287	-	8	142522397	-	069 / 080b / 089c	Htr8-05	(Micro)homology	TGAGA	No	-	-	No	-	-
070a	Htr8-05	8	1192287	1192444	8	137045039	137045321	TT	15	Validated	Yes	8	1192449	+	8	108023612	+	070a / 080a / 089b	Htr8-05	(Micro)homology	TGCCAC	No	-	-	No	-	-
070b	Htr8-05	8	1192287	1192444	8	137045039	137045321	TT	15	Validated	Yes	8	108023677	+	8	137045321	-	070b / 079 / 089a	Htr8-05	Blunt	None	No	-	-	No	-	-
071	Htr8-05	8	1197286	1197484	8	143642084	143642204	TH	3	Validated	Yes	8	1197524	+	8	143642084	+	071 / 072a	Htr8-05	(Micro)homology	CC	No	-	-	No	-	-
072a	Htr8-05	8	1197388	1197524	8	137045001	137045273	TH	4	Validated	Yes	8	1197524	+	8	143642084	+	071 / 072a	Htr8-05	(Micro)homology	CC	No	-	-	No	-	-
072b	Htr8-05	8	1197388	1197524	8	137045001	137045273	TH	4	Validated	Yes	8	143642204	+	8	134924527	+	072b / 088b	Htr8-05	Blunt	None	No	-	-	No	-	-
072c	Htr8-05	8	1197388	1197524	8	137045001	137045273	TH	4	Validated	Yes	8	134924609	+	8	137045001	+	072c / 085 / 088a	Htr8-05	(Micro)homology	CC__GAAG	No	-	-	No	-	-
073	Htr8-05	8	8443179	8443608	8	134961114	134961506	HT	16	Validated	Yes	8	8443179	-	8	134961506	-	073	Htr8-05	(Micro)homology	TTA_T	No	-	-	No	-	-
074	Htr8-05	8	8454701	8455085	8	89874614	89874926	TH	11	Validated	Yes	8	8455085	+	8	89874614	+	074	Htr8-05	(Micro)homology	CTTT	No	-	-	Yes	c051 start	87723
075	Htr8-05	8	39299283	39299478	8	66420806	66421134	HT	5	Validated	Yes	8	39299283	-	8	66421217	-	075	Htr8-05	(Micro)homology	C	No	-	-	No	-	-
076	Htr8-05	8	64751439	64751756	8	139441235	139441724	HT	20	Validated	Yes	8	64751439	-	8	139441724	-	076	Htr8-05	(Micro)homology	CA	No	-	-	Yes	c051 end	78234
077	Htr8-05	8	64763456	64763970	8	139440950	139441285	TH	18	Validated	Yes	8	64763970	+	8	139440950	+	077	Htr8-05	(Micro)homology	TT	No	-	-	No	-	-
078	Htr8-05	8	108022677	108022950	8	143644677	143645046	HT	23	Validated	Yes	8	108022677	-	8	143645046	-	078a	Htr8-05	(Micro)homology	CC	No	-	-	No	-	-
079	Htr8-05	8	108023612	108023677	8	137045001	137045321	TT	15	Validated	Yes	8	108023677	+	8	137045321	-	070b / 079 / 089a	Htr8-05	Blunt	None	No	-	-	No	-	-
080a	Htr8-05	8	108023612	108023677	8	142522182	142522397	HT	4	Validated	Yes	8	108023612	-	8	1192449	-	070a / 080a / 089b	Htr8-05	(Micro)homology	GTGGCA	No	-	-	No	-	-
080b	Htr8-05	8	108023612	108023677	8	142522182	142522397	HT	4	Validated	Yes	8	1192287	-	8	142522397	-	069 / 080b / 089c	Htr8-05	(Micro)homology	TCTCA	No	-	-	No	-	-
081	Htr8-05	8	108034435	108034813	8	114177829	114178220	TH	14	Validated	Yes	8	108034813	+	8	114177829	+	081	Htr8-05	(Micro)homology	A	No	-	-	No	-	-
082	Htr8-05	8	114190854	114191187	8	139440950	139441380	TT	26	Validated	Yes	8	114191187	+	8	139441380	-	082	Htr8-05	Insertion	C	No	-	-	No	-	-
083	Htr8-05	8	124727004	124727325	8	124737740	124738150	HT	24	Validated	Yes	8	124727004	-	8	124738150	-	083	Htr8-05	Insertion	GGT	No	-	-	No	-	-
084	Htr8-05	8	134923263	134923601	8	143627587	143628163	HH	13	Validated	Yes	8	134923264	-	8	143627587	+	084	Htr8-05	(Micro)homology	GAGCA	No	-	-	No	-	-
085	Htr8-05	8	134924527	134924609	8	137045068	137045267	TH	6	Validated	Yes	8	134924609	+	8	137045001	+	072c / 085 / 088a	Htr8-05	(Micro)homology	CC__GAAG	No	-	-	No	-	-
086	Htr8-05	8	134961141	134961502	8	143640537	143640673	HH	5	Validated	Yes	8	134961109	-	8	143640537	+	086	Htr8-05	(Micro)homology	G	No	-	-	No	-	-
087	Htr8-05	8	134961271	134961571	8	143640536	143640673	TT	5	Validated	Yes	8	143640673	+	8	134961579	-	087	Htr8-05	Blunt	None	No	-	-	No	-	-
088a	Htr8-05	8	137045001	137045321	8	143642084	143642204	HT	8	Validated	Yes	8	137045001	-	8	134924609	-	072c / 085 / 088a	Htr8-05	(Micro)homology	CTTC__GG	No	-	-	No	-	-
088b	Htr8-05	8	137045001	137045321	8	143642084	143642204	HT	8	Validated	Yes	8	134924527	-	8	143642204	-	072b / 088b	Htr8-05	Blunt	None	No	-	-	No	-	-
089a	Htr8-05	8	137045207	137045321	8	142522210	142522397	TT	12	Validated	Yes	8	137045321	+	8	108023677	-	070b / 079 / 089a	Htr8-05	Blunt	None	No	-	-	No	-	-
089b	Htr8-05	8	137045207	137045321	8	142522210	142522397	TT	12	Validated	Yes	8	108023612	-	8	1192449	-	070a / 080a / 089b	Htr8-05	(Micro)homology	GTGGCA	No	-	-	No	-	-
089c	Htr8-05	8	137045207	137045321	8	142522210	142522397	TT	12	Validated	Yes	8	1192287	-	8	142522397	-	069 / 080b / 089c	Htr8-05	(Micro)homology	TGAGA	No	-	-	No	-	-
090	Htr8-05	17	58116241	58116601	17	58295176	58295622	HT	32	Validated	Yes	17	58116241	-	17	58295622	-	090	Htr8-05	Insertion	TGTGATT	-	-	-	-	-	-
091	Htr8-05	18	19670650	19670936	3	81818004	81818112	TT	5	Not validated	-	-	-	-	-	-	-	-	No PCR product	-	-	-	-	-	-	-	-
092	Htr8-07	8	7048875	7049094	8	71660677	71661196	TH	11	Not validated	-	-	-	-	-	-	-	-	Mapping artefact	-	-	No	-	-	No	-	-
093	Htr8-07	8	12486405	12486758	8	71660677	71661122	TH	27	Validated	Yes	8	12486774	+	8	71660677	+	093	Htr8-07	(Micro)homology	TGCT	Yes	c054 end	426170	Yes	c055 end	10236
094	Htr8-07	8	64747836	64748007	8	116661246	116661593	TT	3	Validated	Yes	8	64748012	+	8	116661614	-	094	Htr8-07	Blunt	None	Yes	c055 start	18088	Yes	c056 start	27931
Kneissig et al
