# Supplementary figures and images for: Micronuclei-based model system reveals functional consequences of chromothripsis in human cells
Source: eLife journal article supplement (doi:10.7554/elife.50292), 2019-11-28

**Copy Number** 0 1 2 or unknown 3 4 or more

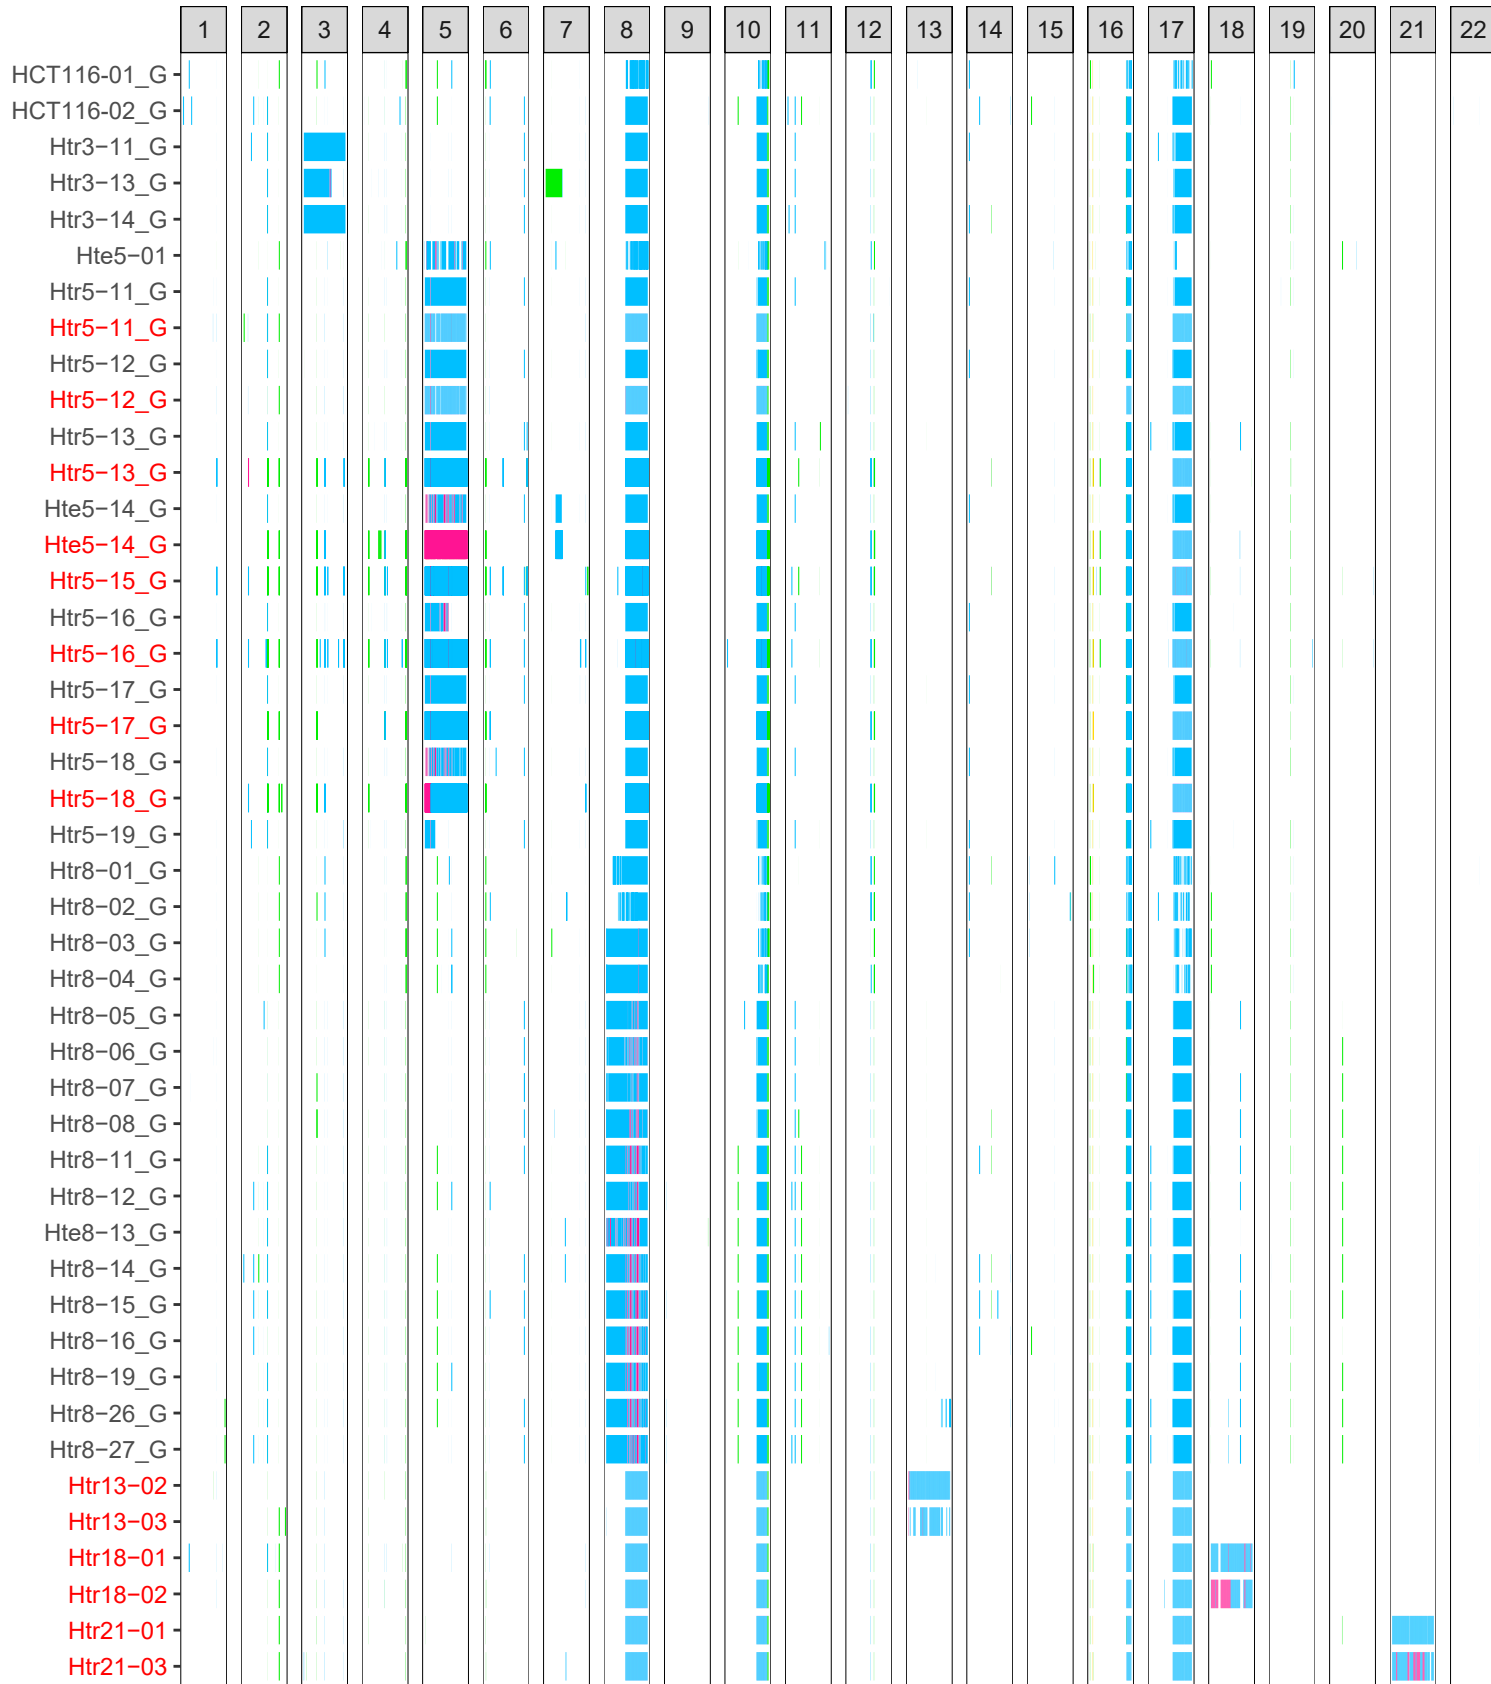

Figure 1 - Figure Supplement 1  
Kneissig et al

Supplement: supp [file elife_poa_e50292_Figure_1_figure_supplement_1.pdf › elife_poa_e50292_Figure_1_figure_supplement_1.pdf]
